# Supplementary material for: Synthesis of novel sustainable optical poly(isosorbide thioethers) with high refractive indices and good biocompatibility using functional ionic liquid catalysts
Source: Royal Society of Chemistry journal article supplement (doi:10.1039/d4py00344f), 2024-01-01
Supplement: d4py00344f1.pdf [file d4py00344f1.pdf]

## Supporting information

Synthesis of novel sustainable optical poly(isosorbide thioethers) with high refractive index and good biocompatibility by functional ionic liquid catalysts

Heng Wang,<sup>a,b,c</sup> Weilu Ding,<sup>b</sup> Zhencai Zhang,<sup>b,c,e</sup> Yiwen Zhang,<sup>b</sup> Zhao Yang,<sup>b</sup> Mi Feng,<sup>b</sup> Ming Jiang<sup>b</sup> and Fei Xu,<sup>\*b,c,d,e</sup>

<sup>a</sup> Chengdu Institute of Organic Chemistry, Chinese Academy of Sciences, Chengdu 610041, P. R. China.

<sup>b</sup> CAS Key Laboratory of Green Process and Engineering, State Key Laboratory of Multiphase Complex Systems, Beijing Key Laboratory of Ionic Liquids Clean Process, Institute of Process Engineering, Chinese Academy of Sciences, Beijing 100190, P. R. China.

<sup>c</sup> University of Chinese Academy of Sciences, Beijing 100049, P. R. China.

<sup>d</sup> Longzihu New Energy Laboratory, Zhengzhou Institute of Emerging Industrial Technology, Henan University, Zhengzhou, Henan 450000, P. R. China.

<sup>e</sup> Huizhou Institute of Green Energy and Advanced Materials, Huizhou, Guangdong 516081, P. R. China.

Corresponding E-mail: [fxu@ipe.ac.cn](mailto:fxu@ipe.ac.cn)

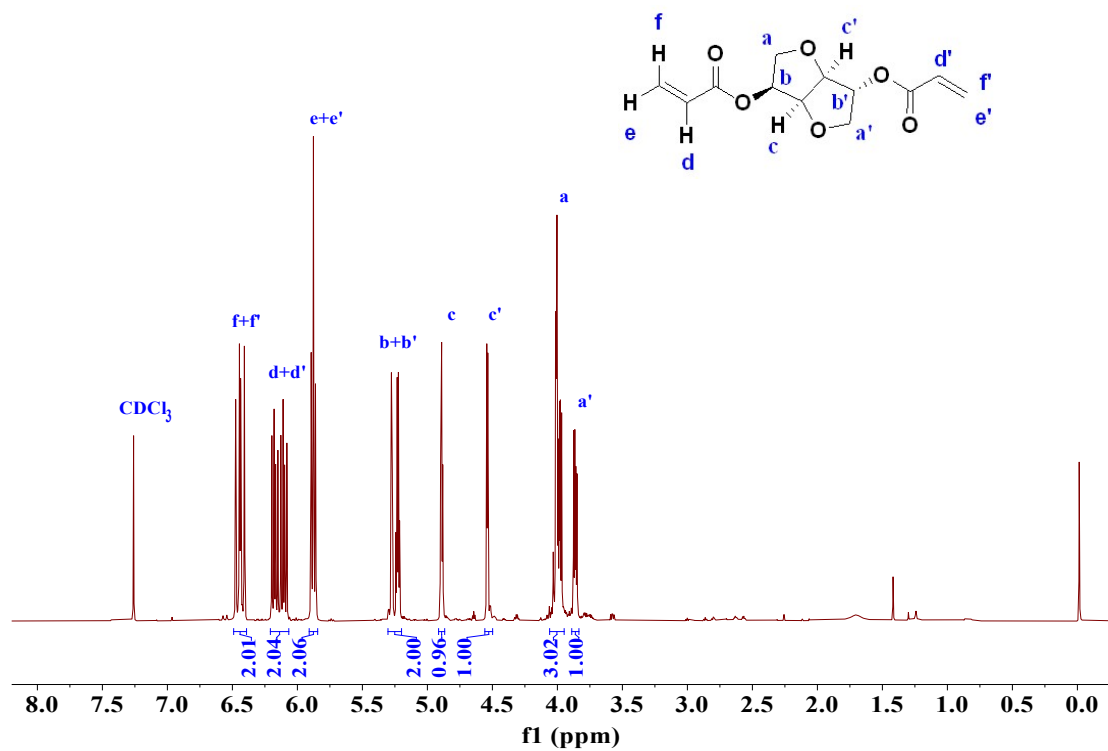

Figure S1.  $^1\text{H}$  NMR spectrum of ISDA ( $\text{CDCl}_3$ , 600 MHz).

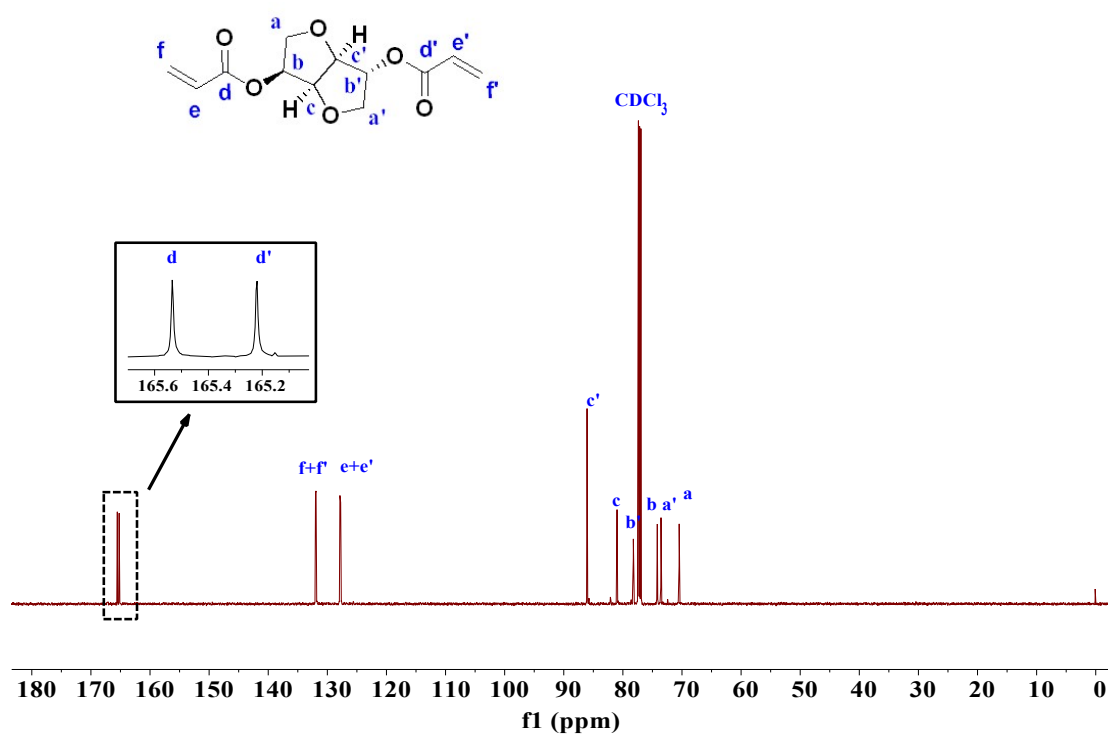

Figure S2.  $^{13}\text{C}$  NMR spectrum of ISDA ( $\text{CDCl}_3$ , 150 MHz).

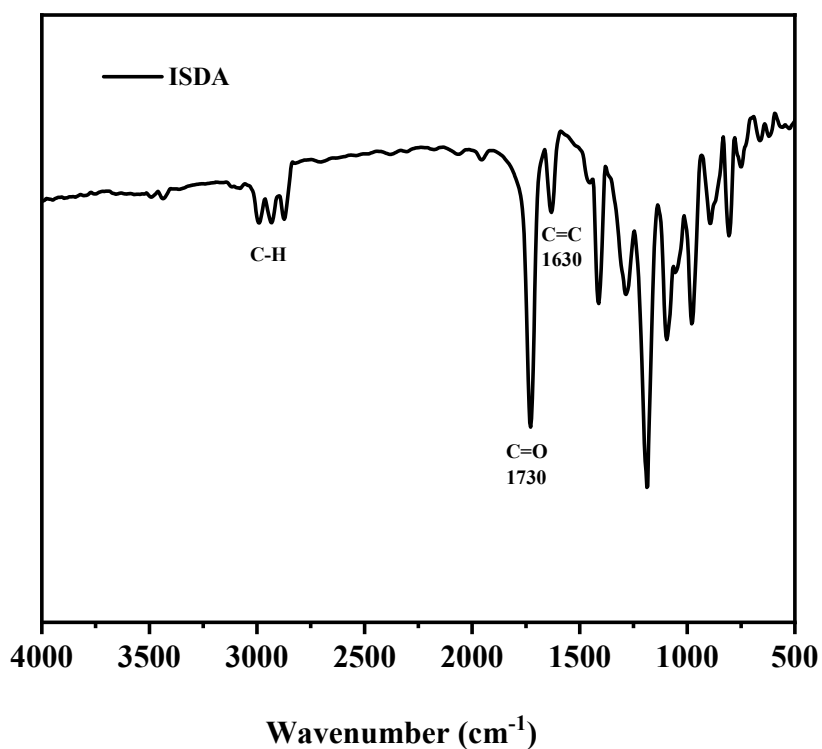

**Figure S3.** FT-IR spectrum of ISDA (KBr).

ISDA: <sup>1</sup>H NMR (600 MHz, CDCl<sub>3</sub>, ppm) δ 6.44 (d, 2H), 6.14 (d, 2H), 5.88 (d, 2H), 5.24 (m, 2H), 4.89 (t, 1H), 4.54 (d, 1H), 4.00 (m, 3H), 3.86 (d, 1H). <sup>13</sup>C NMR (150 MHz, CDCl<sub>3</sub>, ppm) δ 165.53, 132.00, 127.75, 86.06, 80.98, 78.23, 74.18, 73.58, 70.50. FT-IR (KBr, cm<sup>-1</sup>): 2993, 2935, 2873, 1730, 1630, 1415, 1292, 1184, 1095, 976, 890, 806, 748.

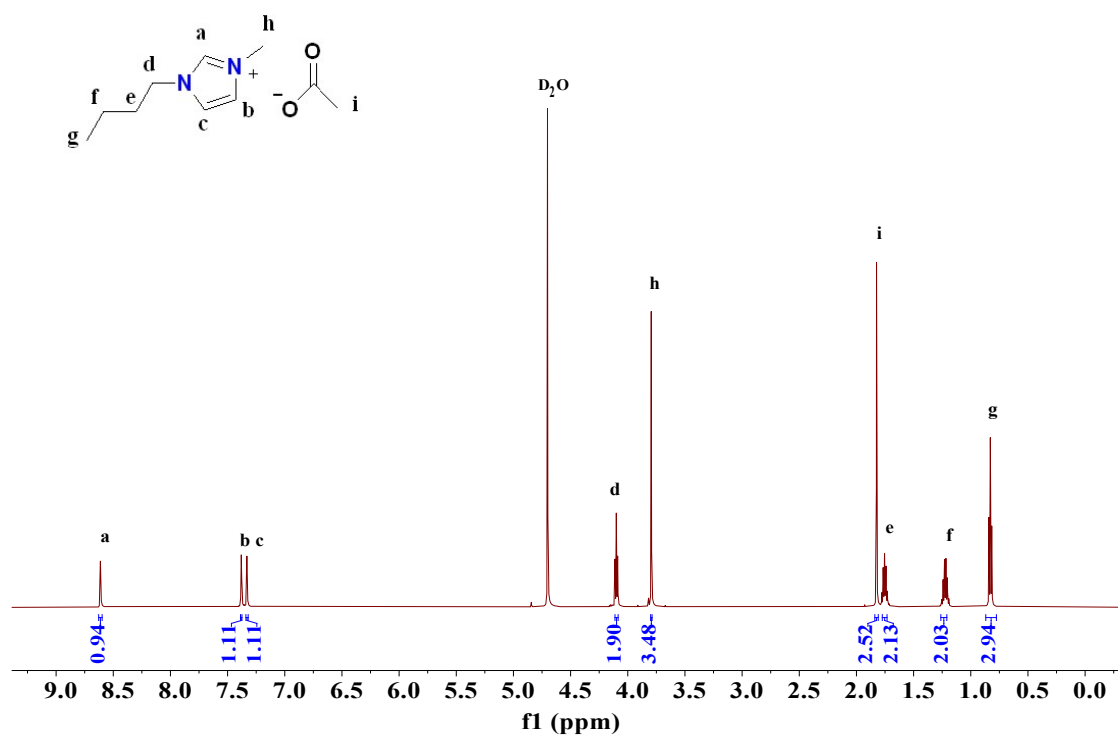

Figure S4. <sup>1</sup>H NMR spectrum of [Bmim][Ac] (D<sub>2</sub>O, 600 MHz).

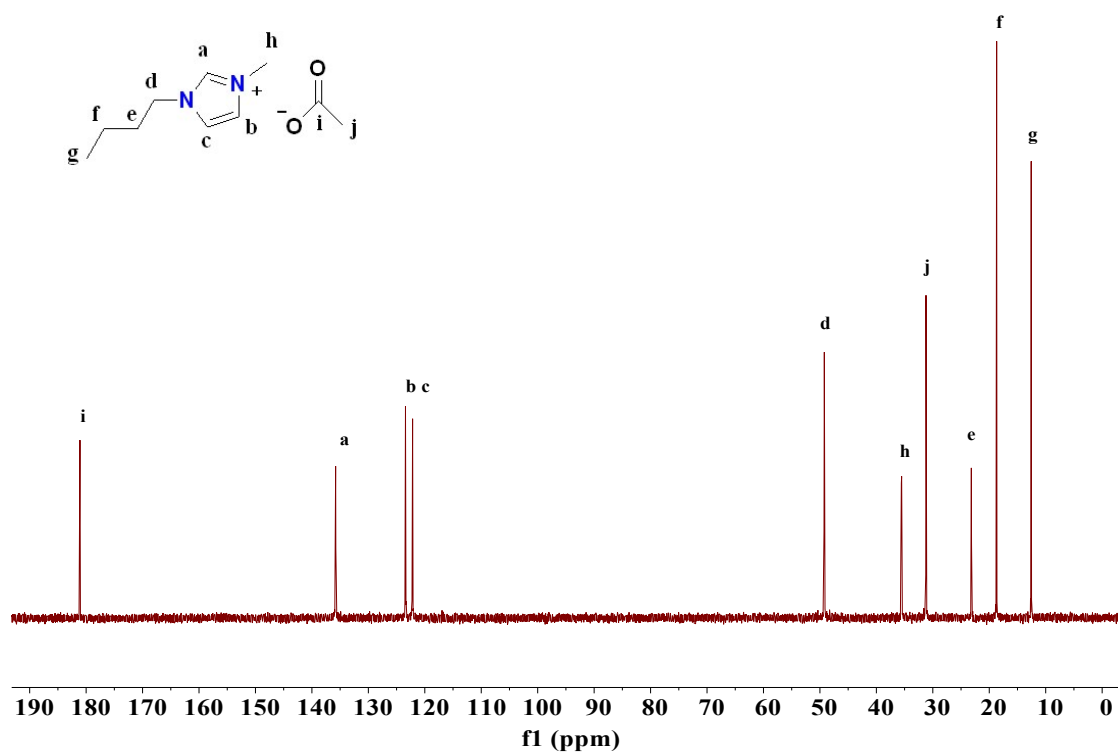

Figure S5. <sup>13</sup>C NMR spectrum of [Bmim][Ac] (D<sub>2</sub>O, 150 MHz).

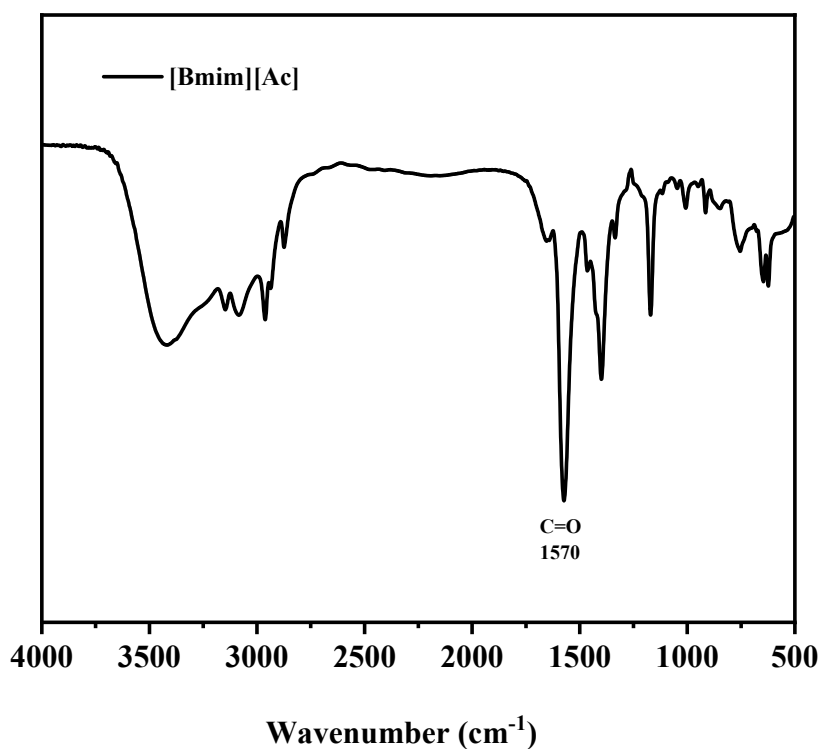

**Figure S6.** FT-IR spectrum of [Bmim][Ac] (KBr).

[Bmim][Ac]:  $^1\text{H}$  NMR (600 MHz,  $\text{D}_2\text{O}$ , ppm)  $\delta$  8.61 (s, 1H), 7.38 (d, 1H), 7.33 (d, 1H), 4.09 (d, 2H), 3.79 (s, 3H), 1.82 (s, 3H), 1.75 (m, 2H), 1.24 (d, 2H), 0.83 (t, 3H).  $^{13}\text{C}$  NMR (150 MHz,  $\text{D}_2\text{O}$ , ppm)  $\delta$  181.09, 135.80, 123.43, 122.16, 49.19, 35.55, 31.21, 23.16, 18.69, 12.57. FT-IR (KBr,  $\text{cm}^{-1}$ ): 3428, 3150, 3095, 2964, 2870, 1570, 1395, 1170, 1010, 917, 754, 644, 622.

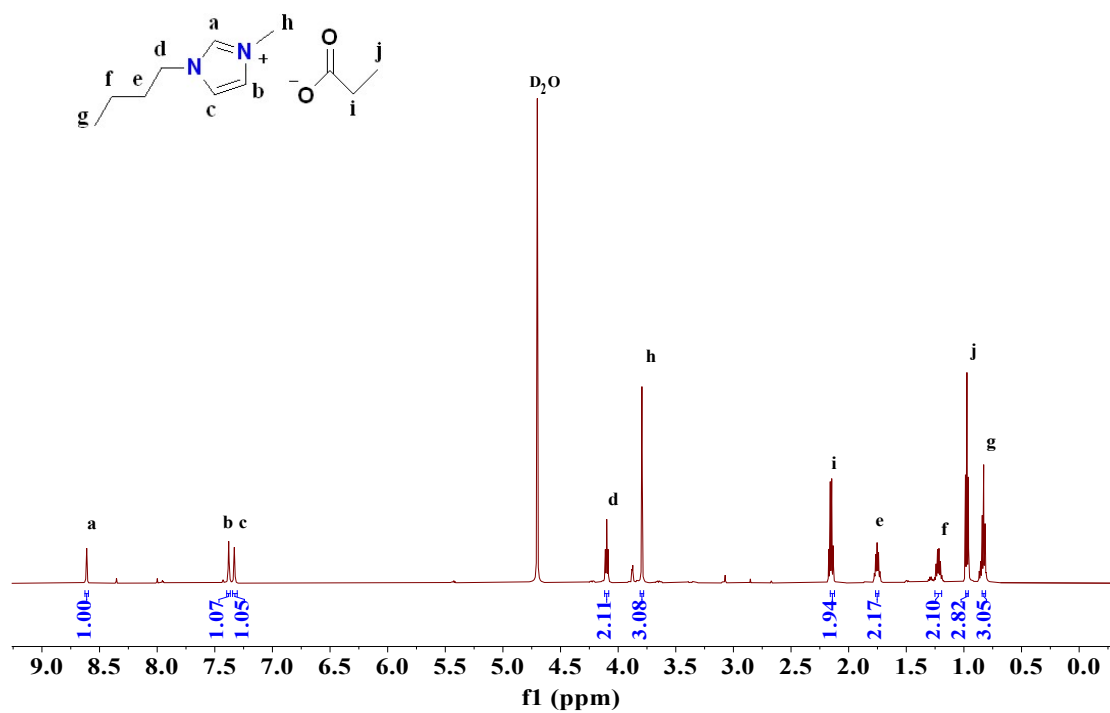

Figure S7. <sup>1</sup>H NMR spectrum of [Bmim][Pr] (D<sub>2</sub>O, 600 MHz).

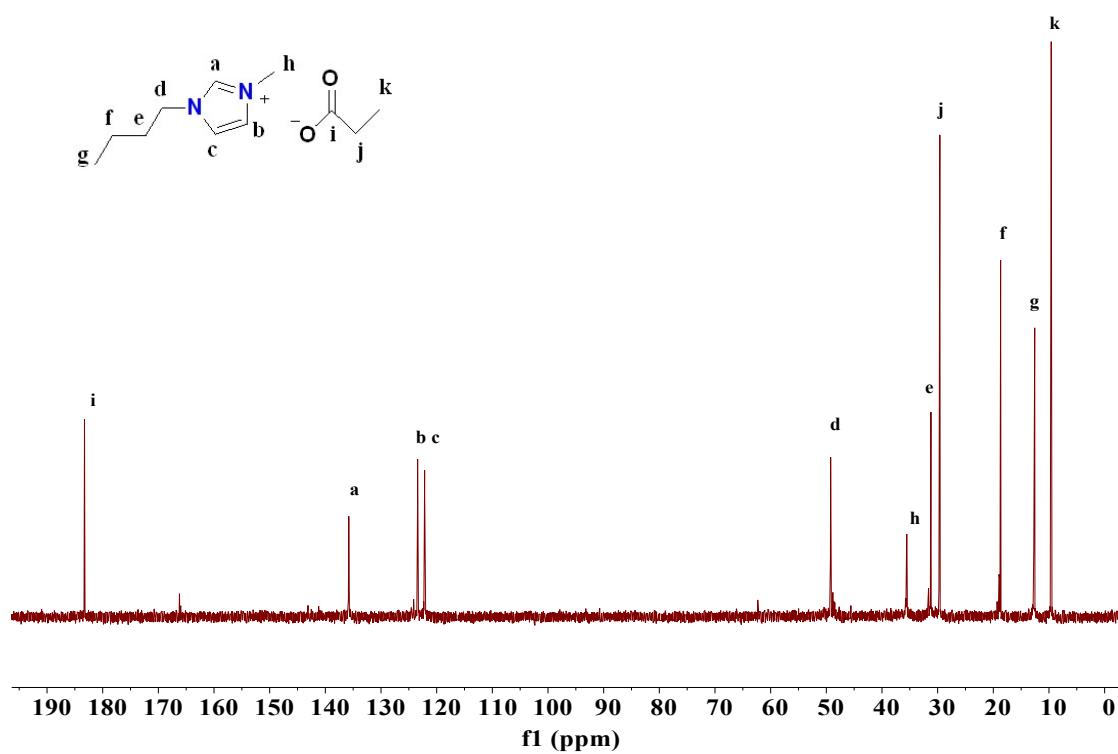

Figure S8. <sup>13</sup>C NMR spectrum of [Bmim][Pr] (D<sub>2</sub>O, 150 MHz).

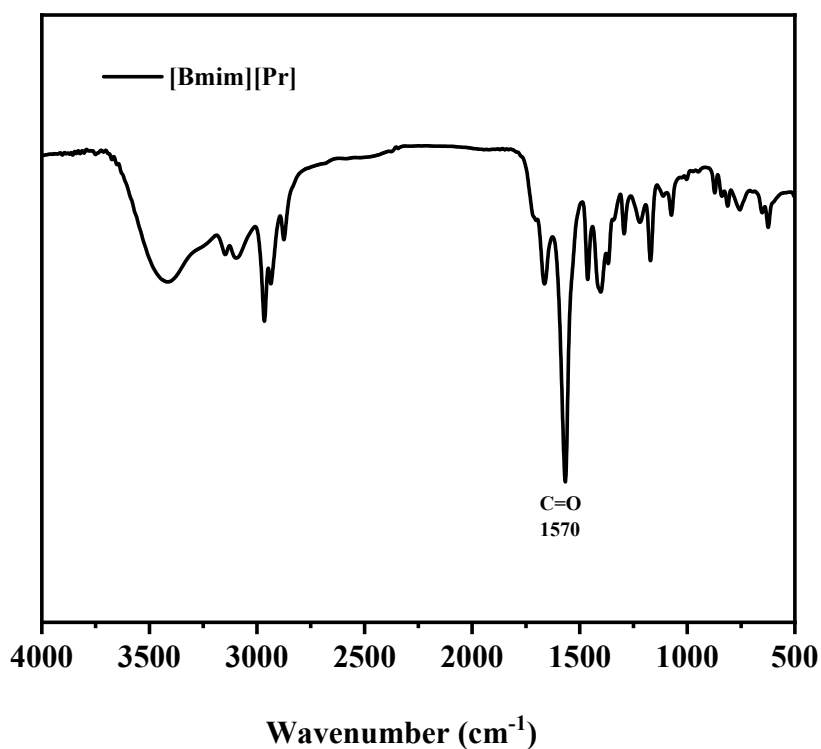

**Figure S9.** FT-IR spectrum of [Bmim][Pr] (KBr).

[Bmim][Pr]: <sup>1</sup>H NMR (600 MHz, D<sub>2</sub>O, ppm) δ 8.61 (s, 1H), 7.38 (t, 1H), 7.33 (m, 1H), 4.10 (t, 2H), 3.79 (s, 3H), 2.15 (m, 2H), 1.75 (m, 2H), 1.22 (q, 2H), 0.98 (m, 3H), 0.83 (m, 3H). <sup>13</sup>C NMR (150 MHz, D<sub>2</sub>O, ppm) δ 183.27, 135.79, 123.42, 122.16, 49.20, 35.54, 31.21, 29.61, 18.68, 12.77, 9.60. FT-IR (KBr, cm<sup>-1</sup>): 3428, 3153, 3091, 2968, 2932, 2874, 1664, 1570, 1460, 1400, 1371, 1290, 1223, 1169, 1071, 874, 813, 756, 620.

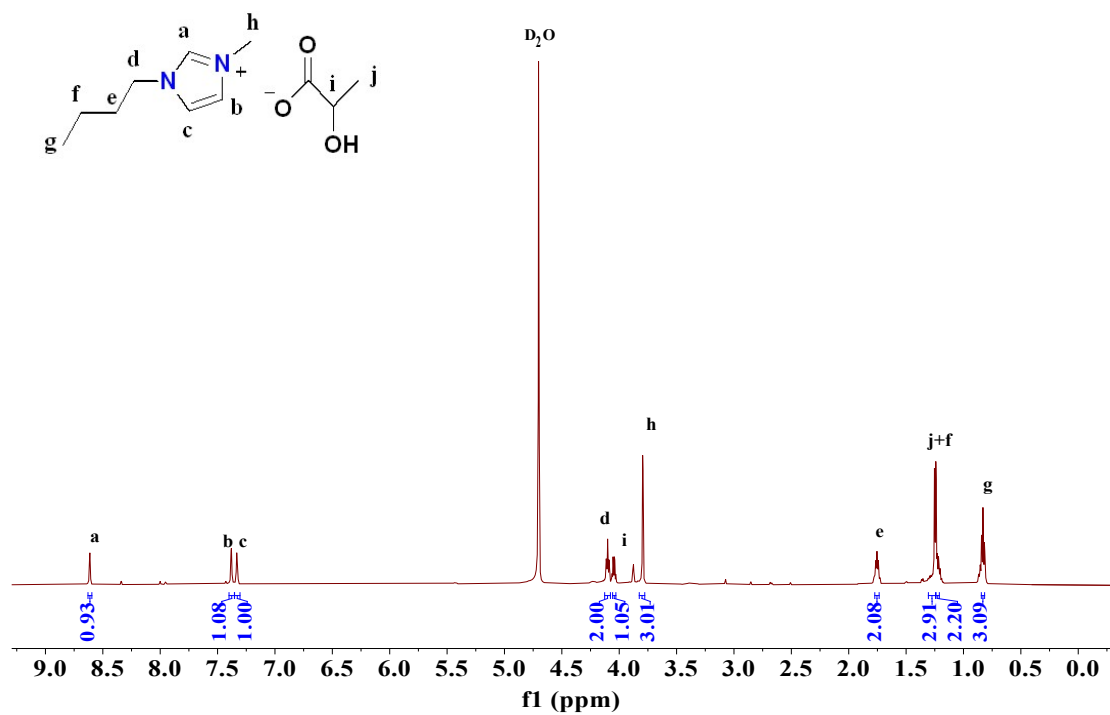

Figure S10. <sup>1</sup>H NMR spectrum of [Bmim][Lac] (D<sub>2</sub>O, 600 MHz).

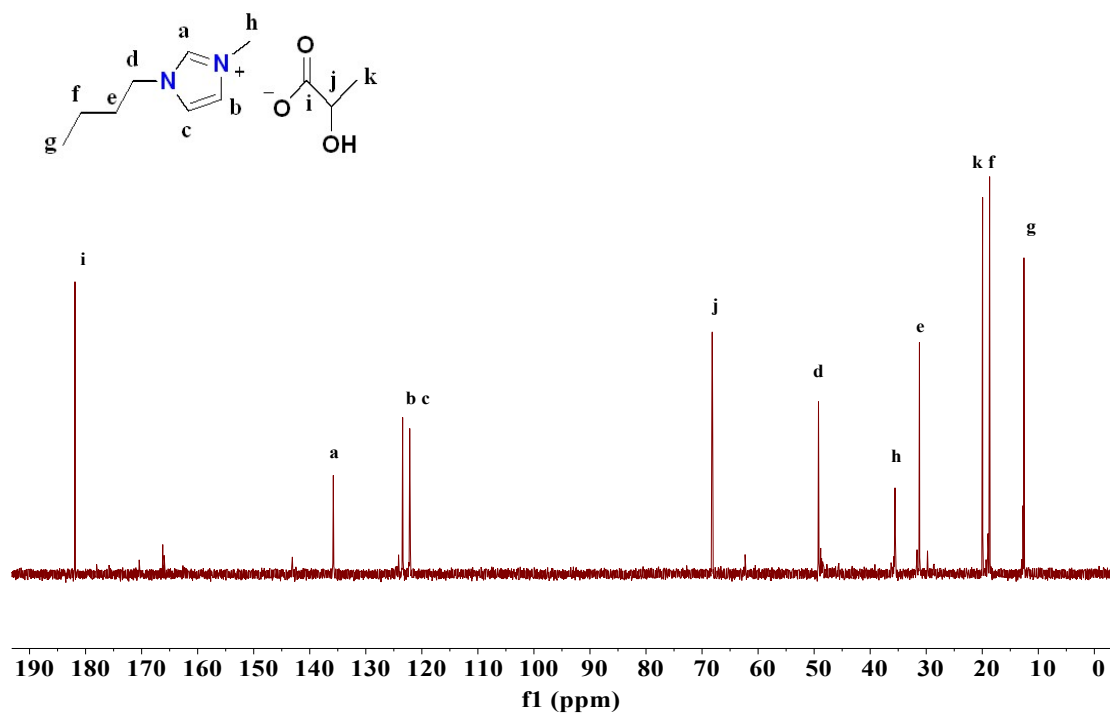

Figure S11. <sup>13</sup>C NMR spectrum of [Bmim][Lac] (D<sub>2</sub>O, 150 MHz).



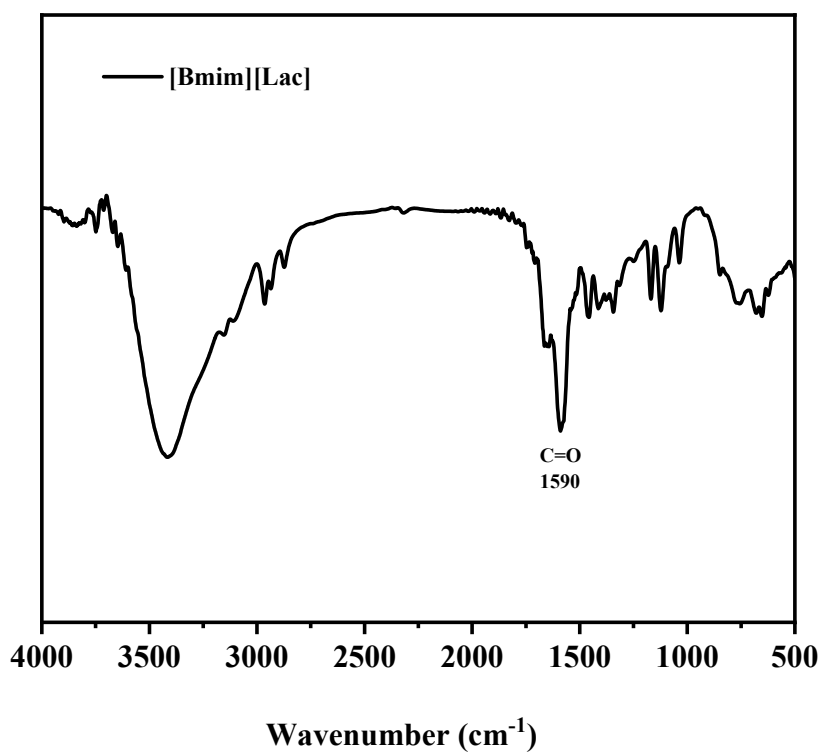

**Figure S12.** FT-IR spectrum of [Bmim][Lac] (KBr).

[Bmim][Lac]:  $^1\text{H}$  NMR (600 MHz,  $\text{D}_2\text{O}$ , ppm)  $\delta$  8.61 (d, 1H), 7.38 (q, 1H), 7.33 (q, 1H), 4.10 (td, 2H), 4.04 (m, 1H), 3.79 (d, 3H), 1.75 (td, 2H), 1.25 (d, 3H), 1.22 (m, 2H), 0.83 (m, 3H).  $^{13}\text{C}$  NMR (150 MHz,  $\text{D}_2\text{O}$ , ppm)  $\delta$  181.89, 135.80, 123.43, 122.10, 68.19, 49.20, 35.55, 31.22, 19.94, 18.69, 12.78. FT-IR (KBr,  $\text{cm}^{-1}$ ): 3405, 3153, 3101, 2964, 2931, 2873, 1643, 1590, 1456, 1410, 1344, 1165, 1122, 1035, 852, 760, 684, 652.

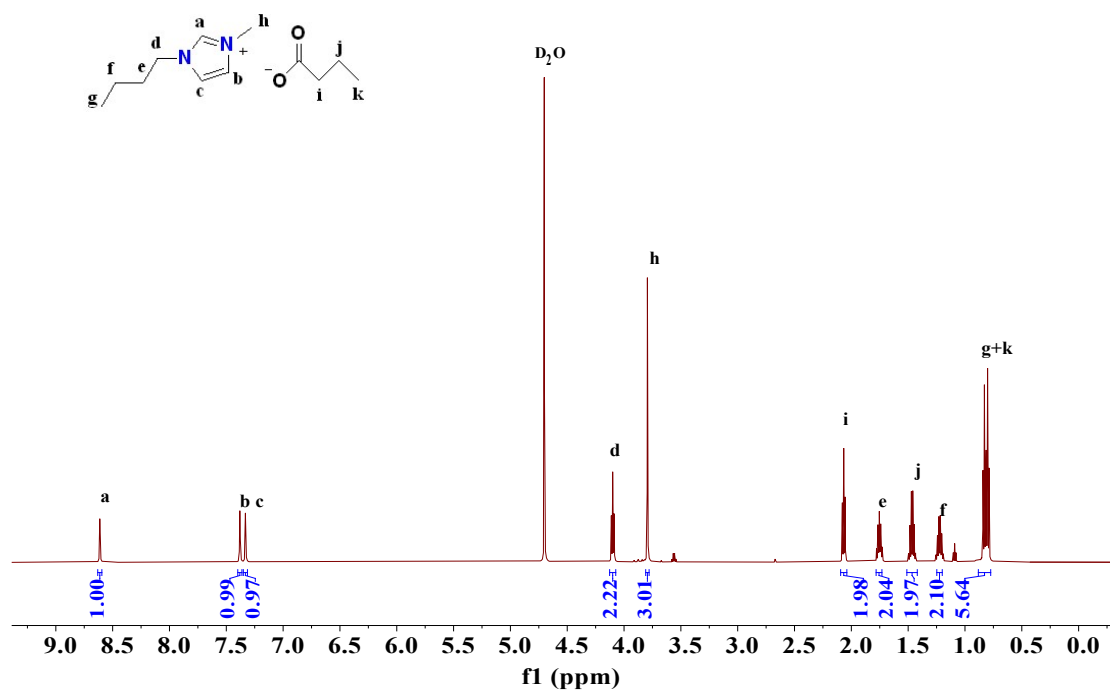

Figure S13. <sup>1</sup>H NMR spectrum of [Bmim][BA] (D<sub>2</sub>O, 600 MHz).

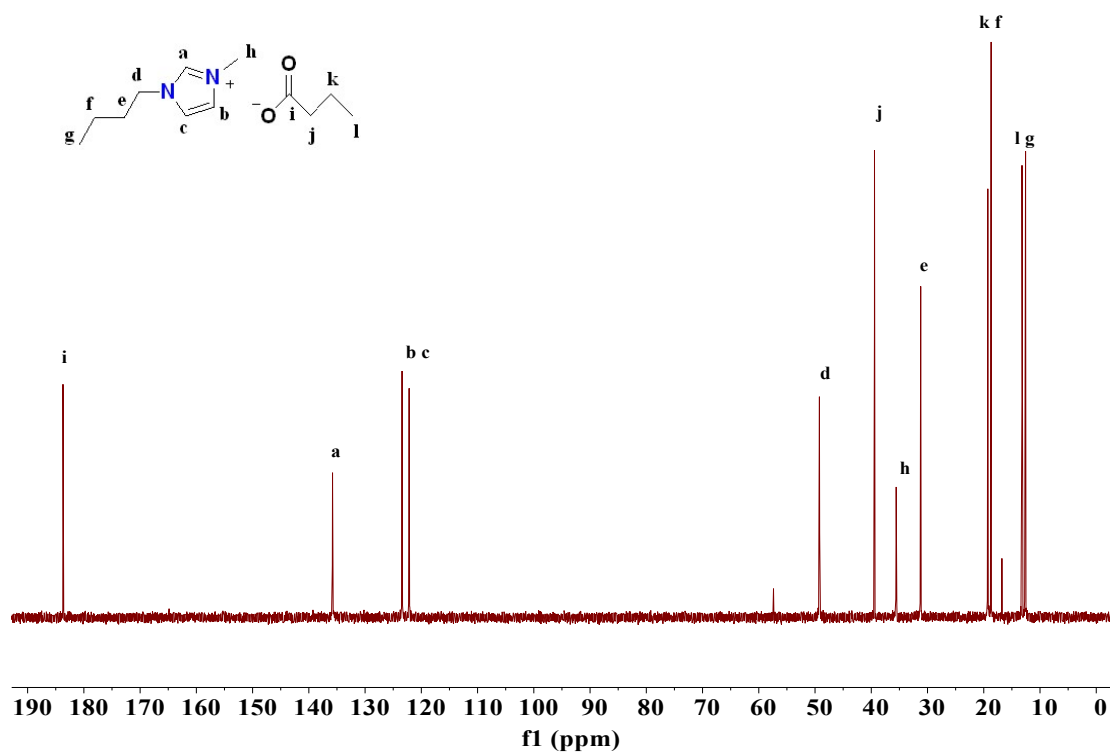

Figure S14. <sup>13</sup>C NMR spectrum of [Bmim][BA] (D<sub>2</sub>O, 150 MHz).

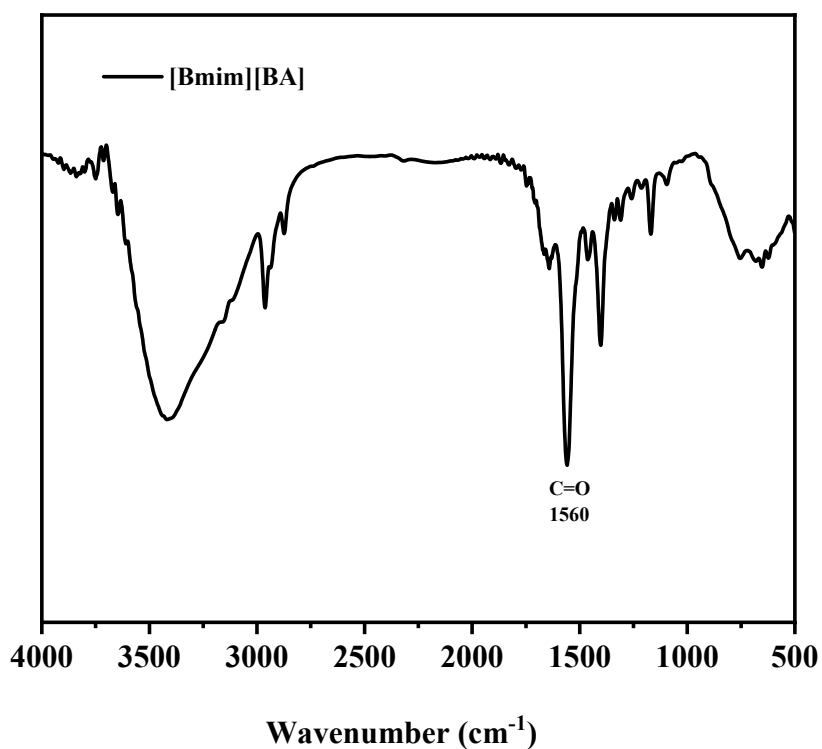

**Figure S15.** FT-IR spectrum of [Bmim][BA] (KBr).

[Bmim][BA]: <sup>1</sup>H NMR (600 MHz, D<sub>2</sub>O, ppm) δ 8.61 (d, 1H), 7.38 (t, 1H), 7.33 (t, 1H), 4.10 (t, 2H), 3.79 (s, 3H), 2.07 (t, 2H), 1.76 (m, 2H), 1.47 (h, 2H), 1.22 (m, 2H), 0.82 (dt, 6H). <sup>13</sup>C NMR (150 MHz, D<sub>2</sub>O, ppm) δ 183.71, 135.79, 123.43, 122.17, 49.20, 39.43, 35.55, 31.21, 19.28, 18.69, 13.20, 12.57. FT-IR (KBr, cm<sup>-1</sup>): 3407, 2958, 2873, 1641, 1560, 1458, 1400, 1338, 1309, 1257, 1170, 1089, 760, 659, 619.

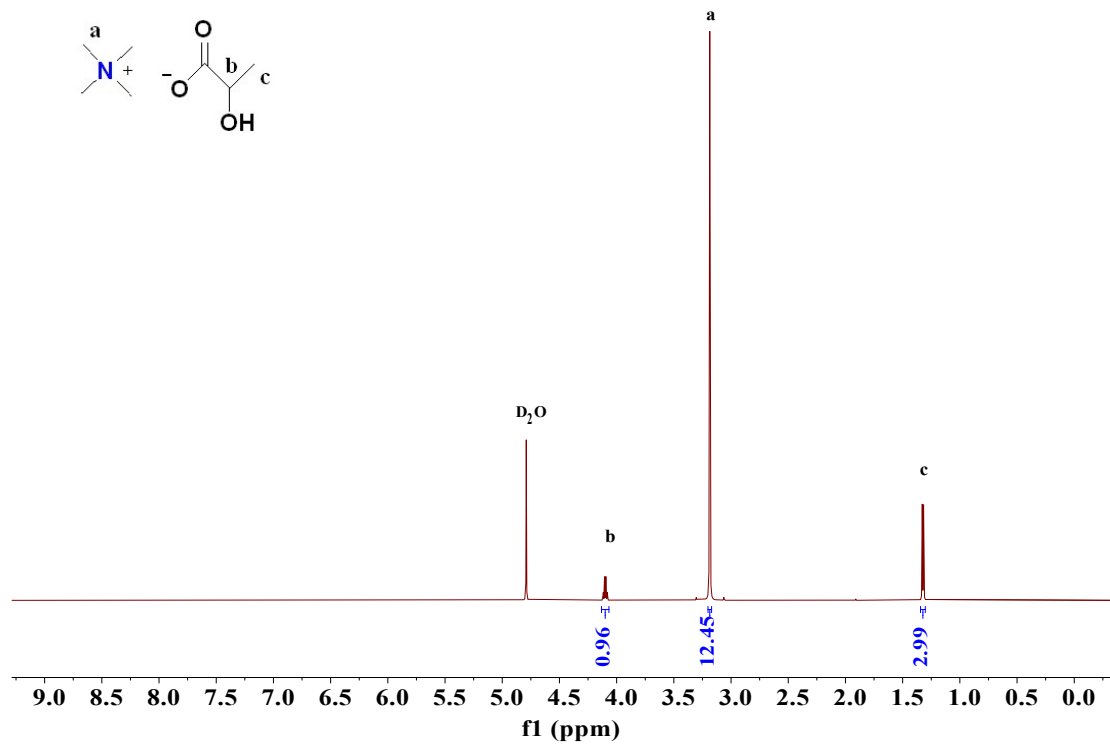

Figure S16.  $^1\text{H}$  NMR spectrum of [TMA][Lac] ( $\text{D}_2\text{O}$ , 600 MHz).

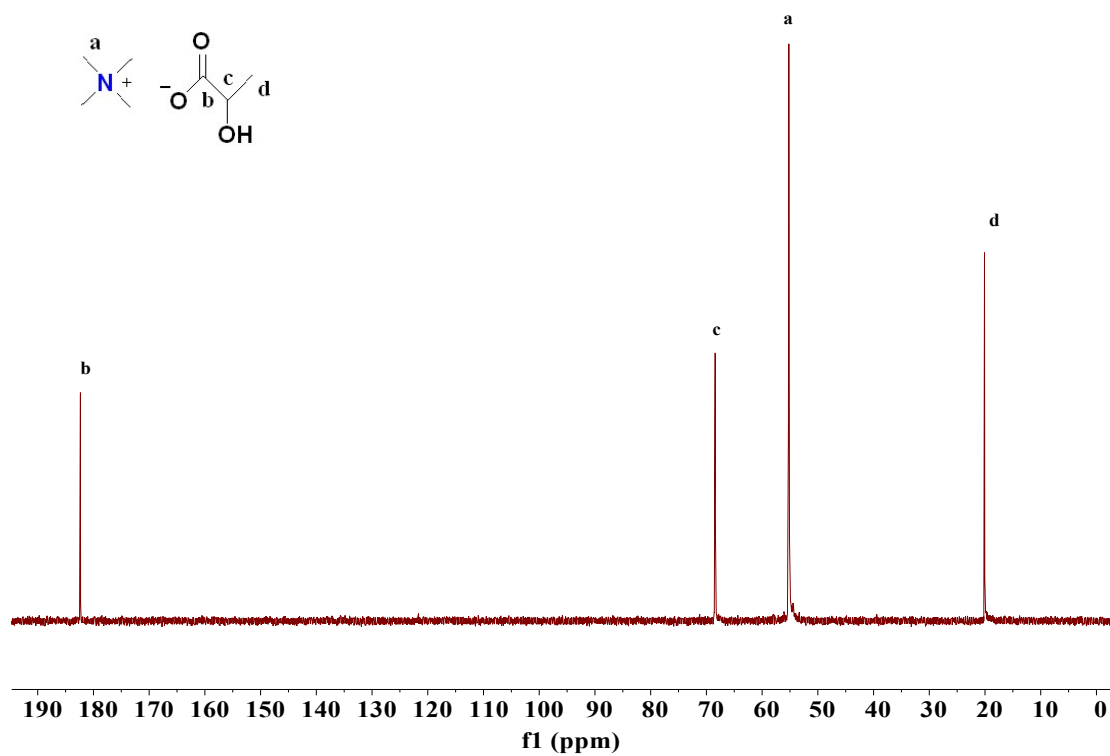

Figure S17.  $^{13}\text{C}$  NMR spectrum of [TMA][Lac] ( $\text{D}_2\text{O}$ , 150 MHz).

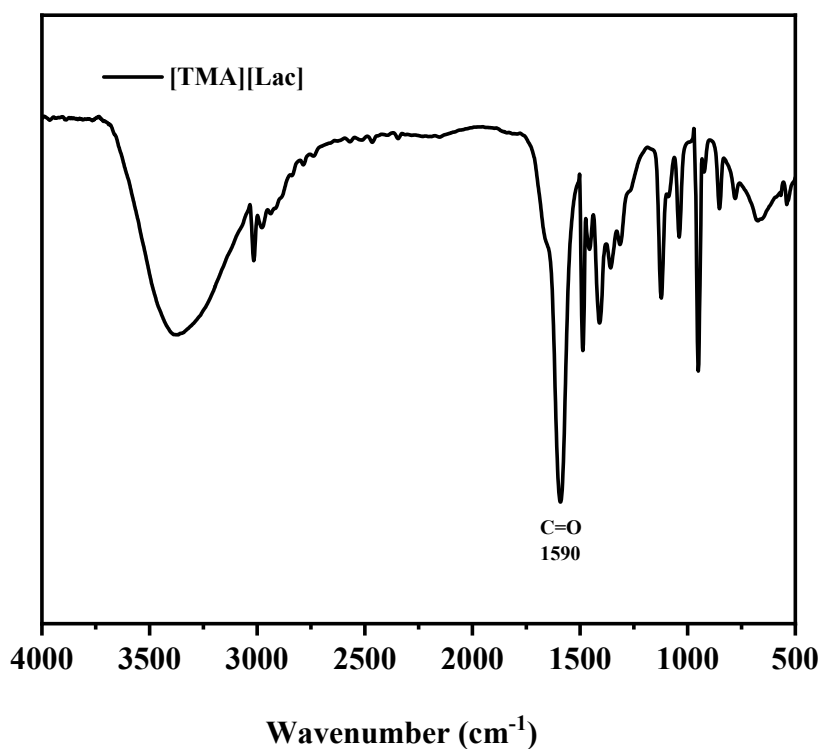

**Figure S18.** FT-IR spectrum of [TMA][Lac] (KBr).

[TMA][Lac]: <sup>1</sup>H NMR (600 MHz, D<sub>2</sub>O, ppm) δ 4.10 (q, 1H), 3.19 (m, 12H), 1.32 (d, 3H). <sup>13</sup>C NMR (150 MHz, D<sub>2</sub>O, ppm) δ 182.33, 68.46, 55.19, 20.08. FT-IR (KBr, cm<sup>-1</sup>): 3401, 3012, 2970, 2933, 1590, 1489, 1452, 1400, 1355, 1313, 1122, 1039, 950, 850, 779, 667, 540.

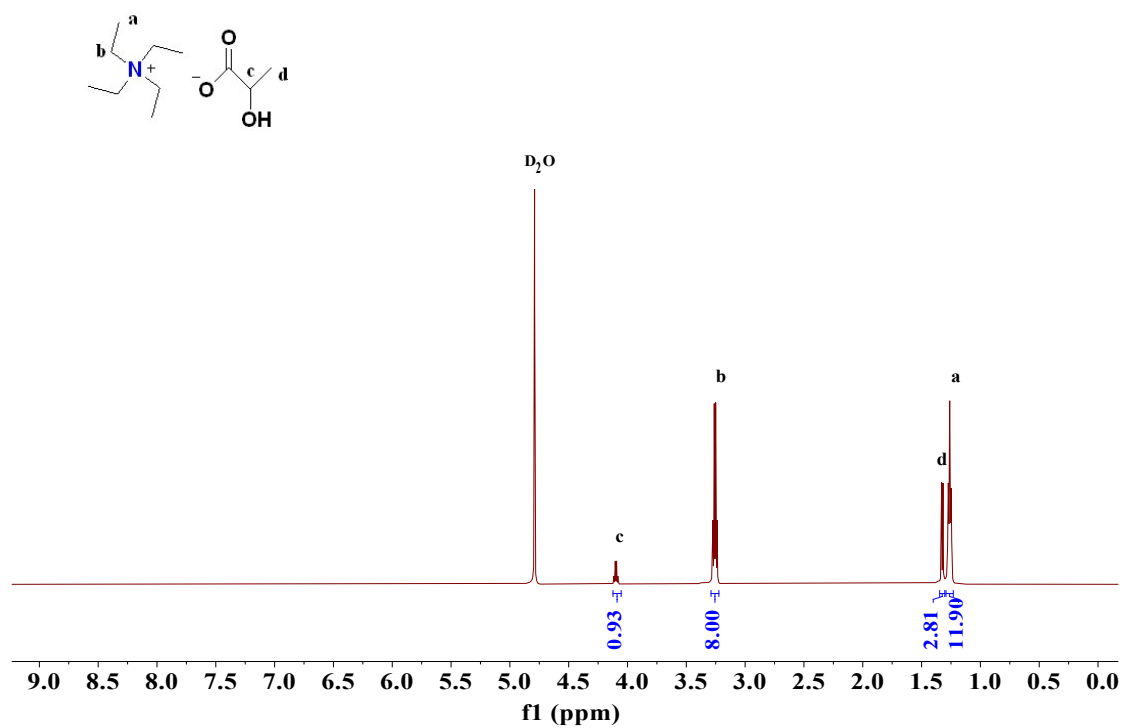

**Figure S19.**  $^1\text{H}$  NMR spectrum of  $[\text{TEA}][\text{Lac}]$  ( $\text{D}_2\text{O}$ , 600 MHz).

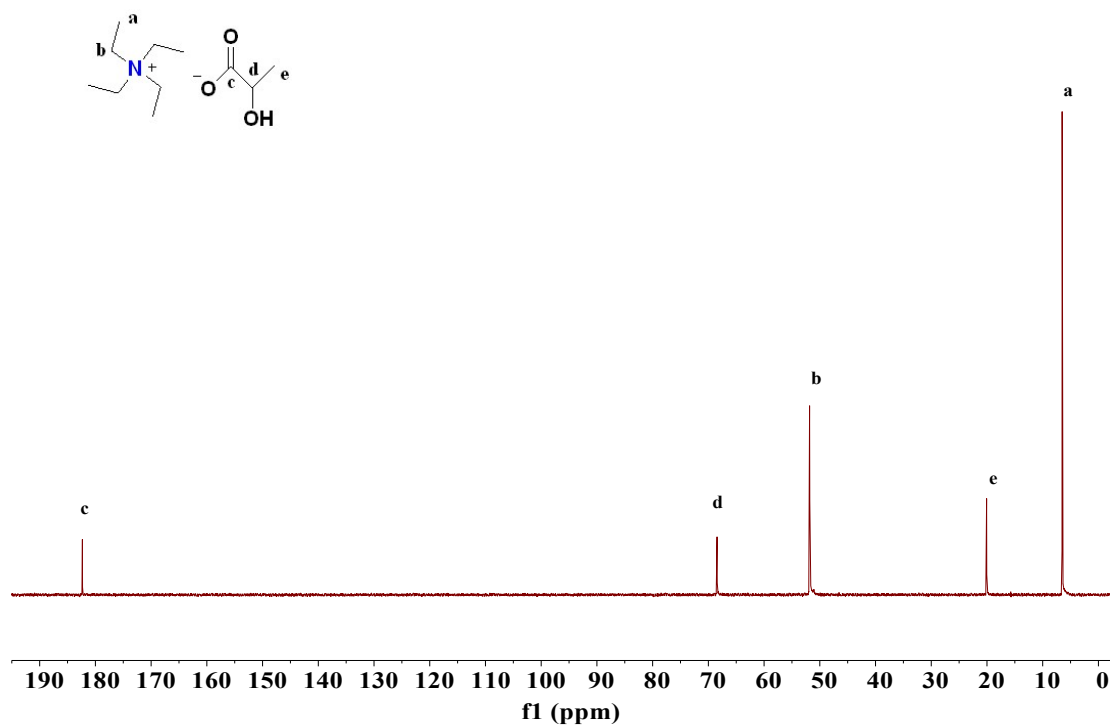

**Figure S20.**  $^{13}\text{C}$  NMR spectrum of  $[\text{TEA}][\text{Lac}]$  ( $\text{D}_2\text{O}$ , 150 MHz).

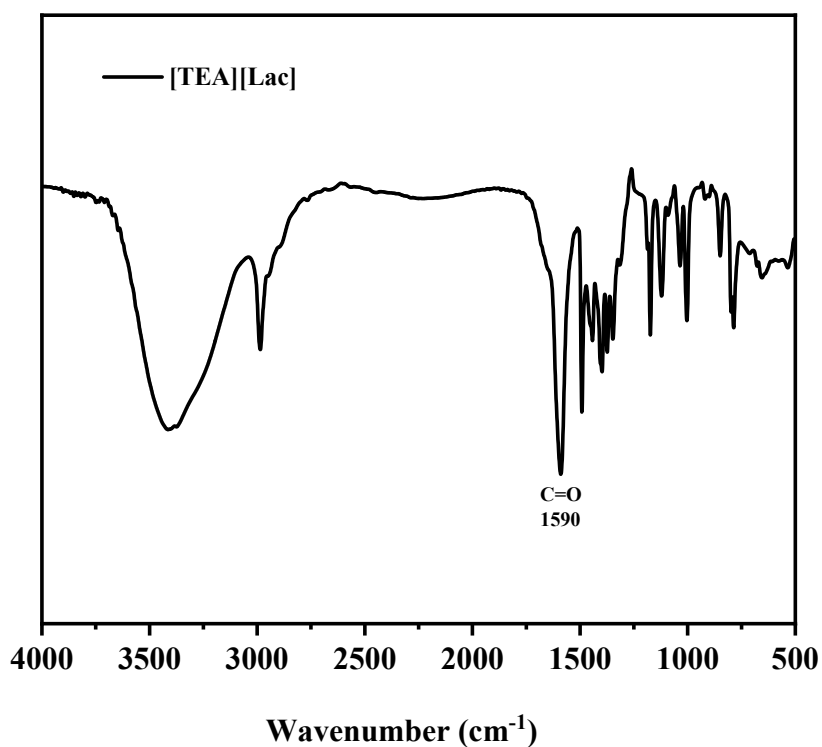

**Figure S21.** FT-IR spectrum of [TEA][Lac] (KBr).

[TEA][Lac]:  $^1\text{H}$  NMR (600 MHz,  $\text{D}_2\text{O}$ , ppm)  $\delta$  4.10 (qd, 1H), 3.26 (q, 8H), 1.32 (dd, 3H), 1.26 (tdd, 12H).  $^{13}\text{C}$  NMR (150 MHz,  $\text{D}_2\text{O}$ , ppm)  $\delta$  182.33, 68.46, 51.85, 20.07, 6.51. FT-IR (KBr,  $\text{cm}^{-1}$ ): 3401, 2988, 1590, 1490, 1441, 1403, 1372, 1345, 1172, 1118, 1037, 1005, 922, 846, 789, 659.

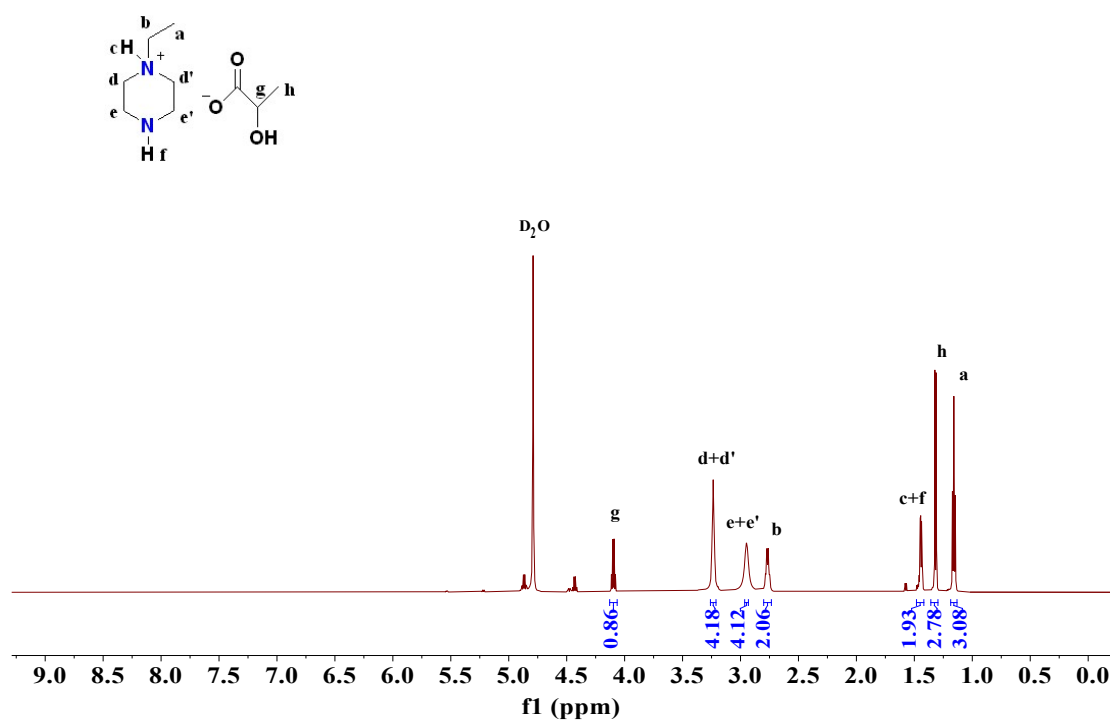

Figure S22.  $^1\text{H}$  NMR spectrum of [Epe][Lac] ( $\text{D}_2\text{O}$ , 600 MHz).

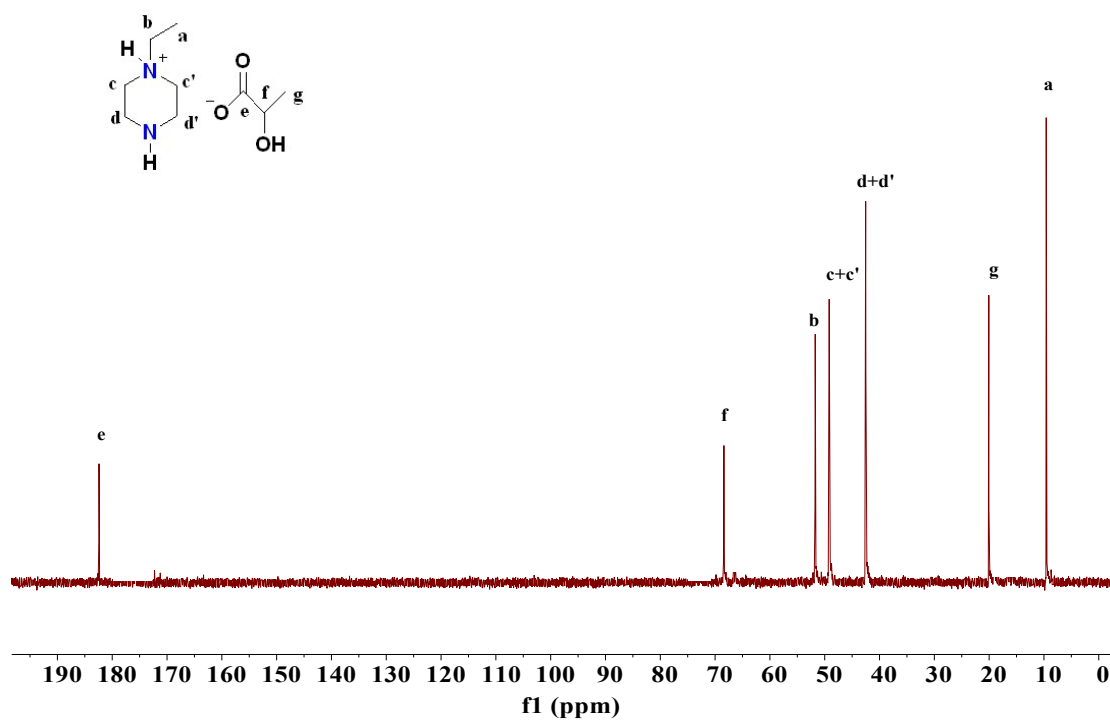

Figure S23.  $^{13}\text{C}$  NMR spectrum of [Epe][Lac] ( $\text{D}_2\text{O}$ , 150 MHz).



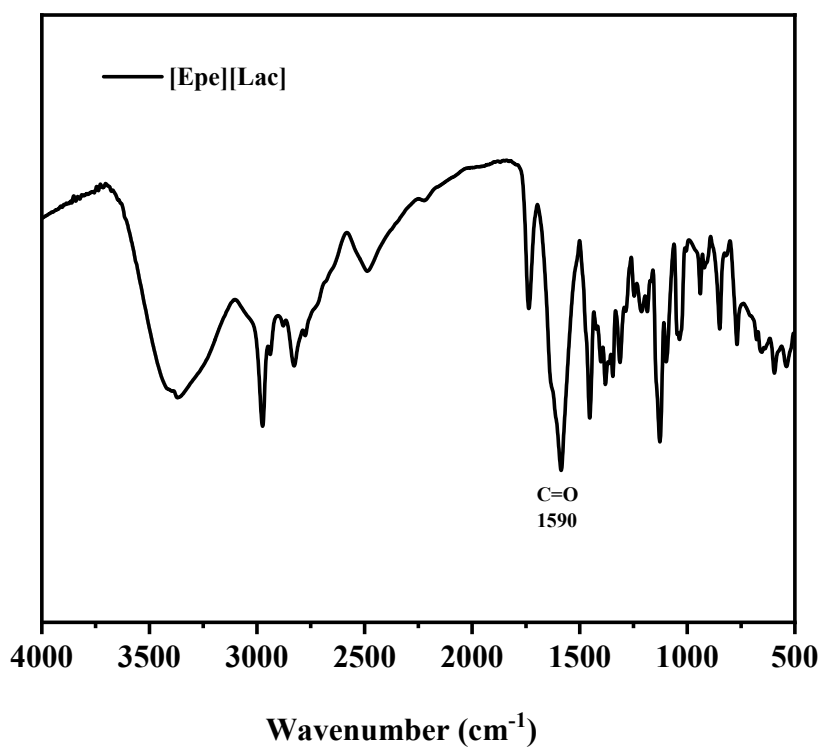

**Figure S24.** FT-IR spectrum of [Epe][Lac] (KBr).

[Epe][Lac]:  $^1\text{H}$  NMR (600 MHz,  $\text{D}_2\text{O}$ , ppm)  $\delta$  4.10 (q, 1H), 3.24 (m, 4H), 2.95 (m, 4H), 2.77 (q, 2H), 1.44 (m, 2H), 1.32 (d, 3H), 1.16 (t, 3H).  $^{13}\text{C}$  NMR (150 MHz,  $\text{D}_2\text{O}$ , ppm)  $\delta$  182.41, 178.41, 175.81, 72.76, 68.42, 66.59, 51.72, 49.18, 42.51, 20.06, 19.01, 16.67, 9.58. FT-IR (KBr,  $\text{cm}^{-1}$ ): 3401, 2977, 2941, 2828, 2772, 2491, 1739, 1590, 1450, 1400, 1380, 1346, 1311, 1208, 1131, 1093, 1031, 937, 851, 766, 662, 599, 538.

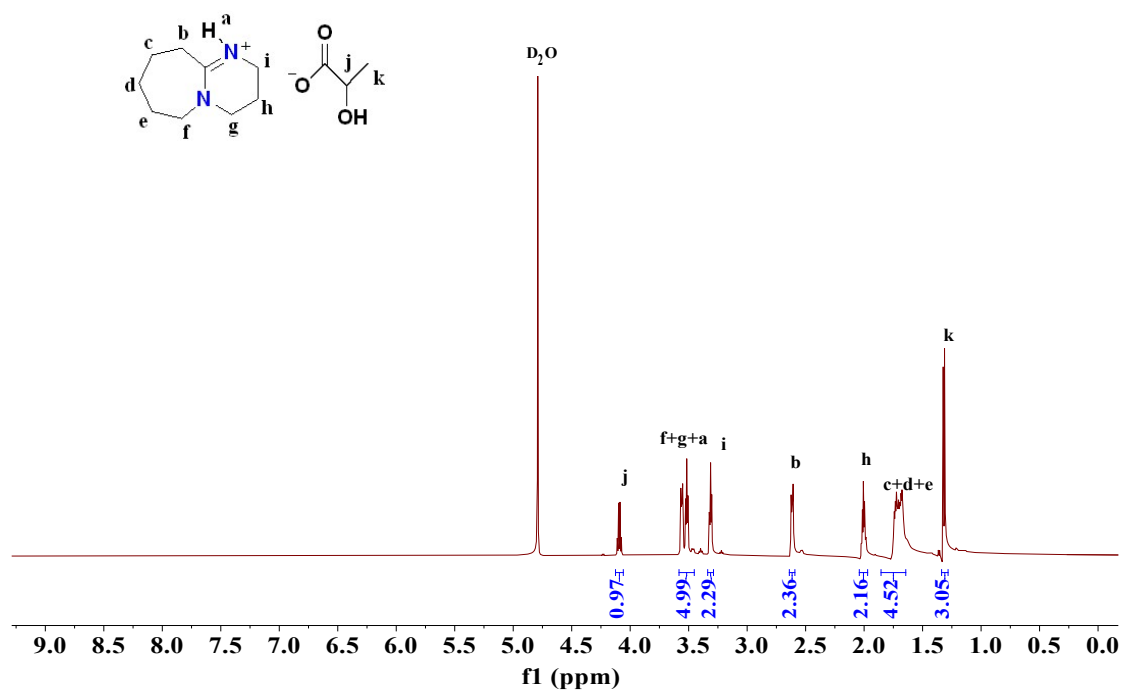

Figure S25. <sup>1</sup>H NMR spectrum of [DBU][Lac] (D<sub>2</sub>O, 600 MHz).

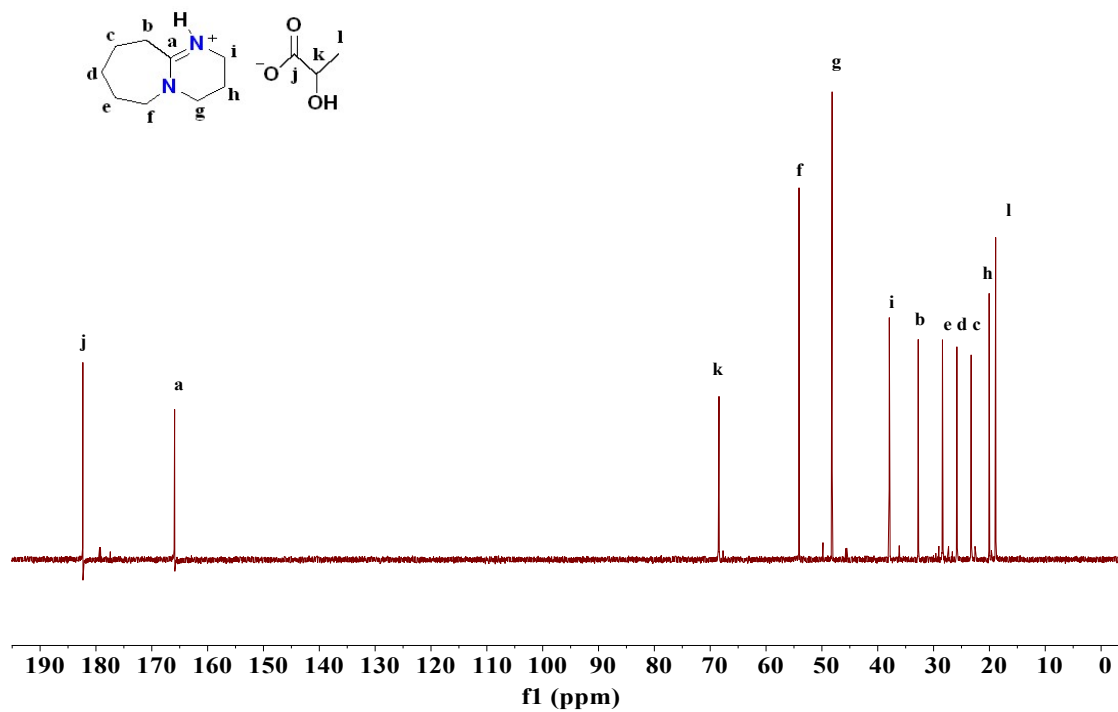

Figure S26. <sup>13</sup>C NMR spectrum of [DBU][Lac] (D<sub>2</sub>O, 150 MHz).

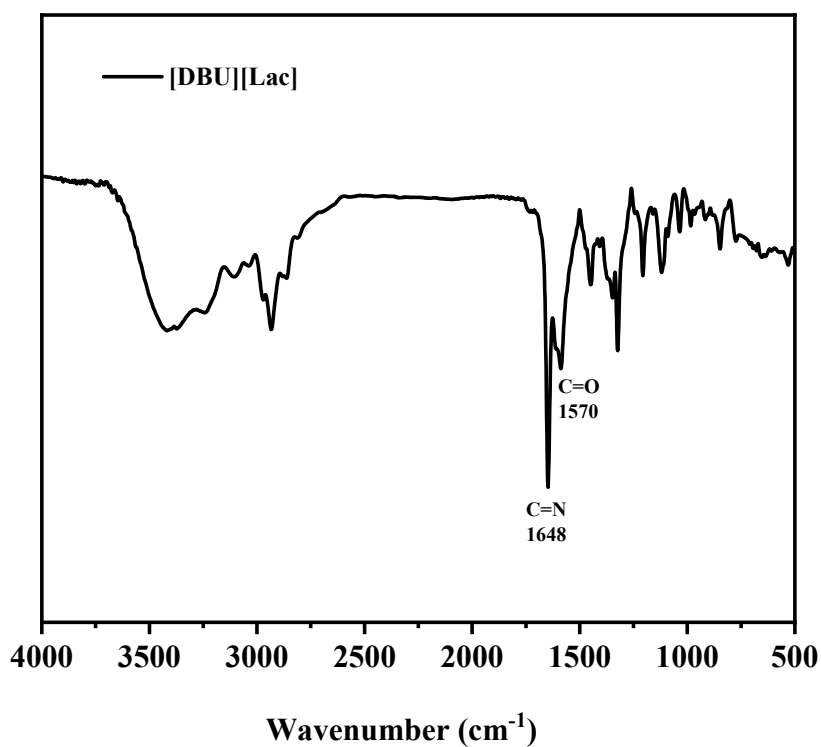

**Figure S27.** FT-IR spectrum of [DBU][Lac] (KBr).

[DBU][Lac]:  $^1\text{H}$  NMR (600 MHz,  $\text{D}_2\text{O}$ , ppm)  $\delta$  4.09 (qd, 1H), 3.54 (dt, 5H), 3.31 (t, 2H), 2.62 (m, 2H), 2.01 (pd, 2H), 1.71 (m, 5H), 1.32 (dd, 3H).  $^{13}\text{C}$  NMR (150 MHz,  $\text{D}_2\text{O}$ , ppm)  $\delta$  182.34, 165.91, 68.45, 54.10, 48.17, 37.92, 32.75, 28.41, 25.83, 23.27, 20.06, 18.87. FT-IR (KBr,  $\text{cm}^{-1}$ ): 3401, 3238, 3099, 3036, 2966, 2932, 2858, 2805, 1648, 1570, 1453, 1350, 1324, 1209, 1116, 1032, 983, 914, 844, 771, 641, 540.

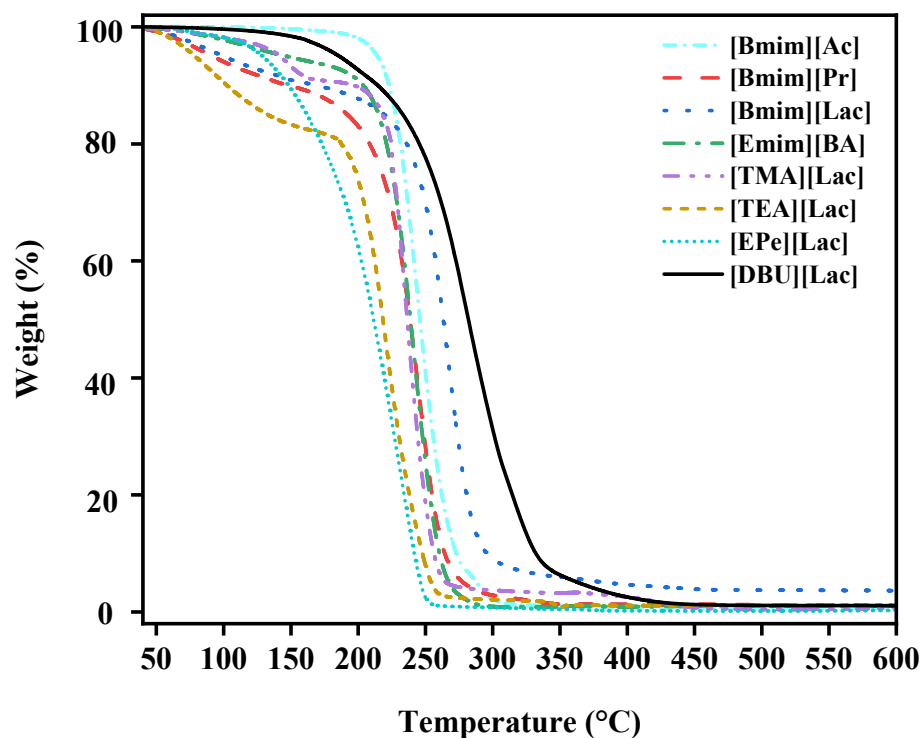

**Figure S28.** TGA curves of different catalysts.

**Table S1.** Thermal decomposition temperature of catalysts. <sup>a</sup>

| Entry | Catalyst    | $T_{d-5\%}$ <sup>b</sup> (°C) | $T_{d-max}$ <sup>c</sup> (°C) |
|-------|-------------|-------------------------------|-------------------------------|
| 1     | [Bmim][Ac]  | 214                           | 253                           |
| 2     | [Bmim][Pr]  | 91                            | 246                           |
| 3     | [Bmim][Lac] | 100                           | 270                           |
| 4     | [Bmim][BA]  | 146                           | 243                           |
| 5     | [TMA]Lac    | 142                           | 237                           |
| 6     | [TEA]Lac    | 79                            | 222                           |
| 7     | [EPe]Lac    | 129                           | 233                           |
| 8     | [DBU]Lac    | 186                           | 285                           |

<sup>a</sup> Measured by TGA at nitrogen atmosphere.

<sup>b</sup> Temperature at 5% weight loss ( $T_{d-5\%}$ ).

<sup>c</sup> Temperature at maximum weight loss rate.

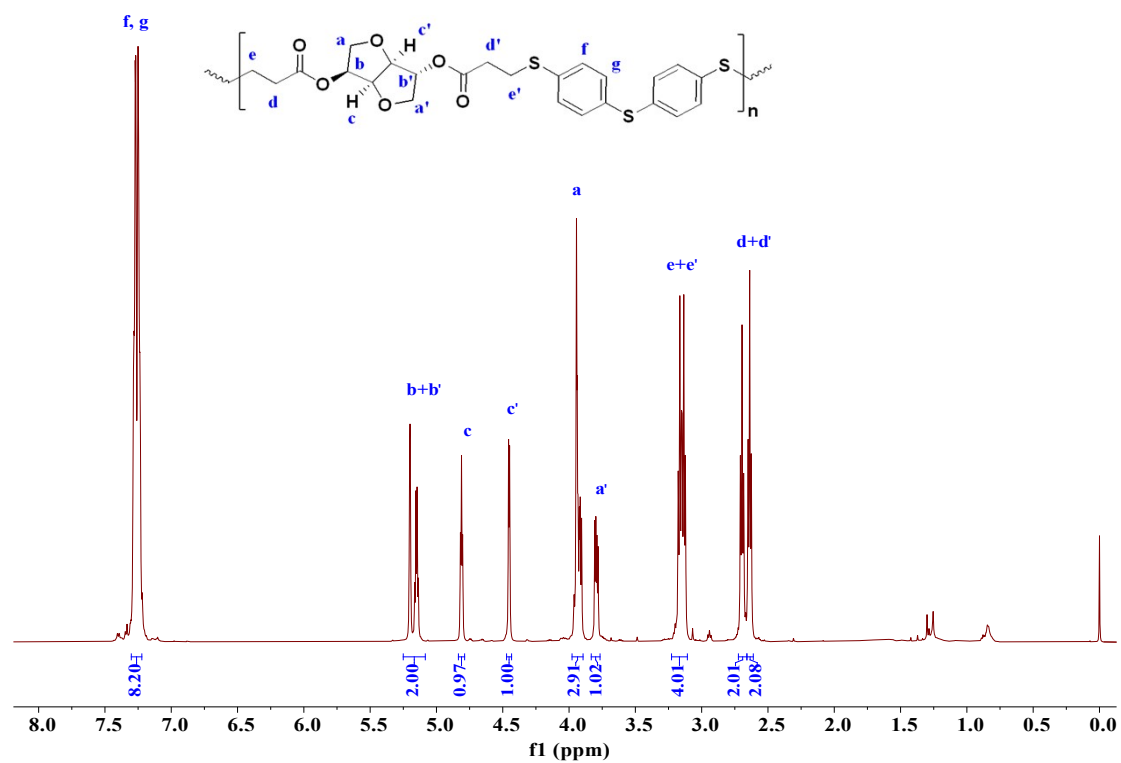

Figure S29.  $^1\text{H}$  NMR spectrum of  $\text{PIT}_{100}\text{E}_0$  synthesized by  $[\text{DBU}][\text{Lac}]$  ( $\text{CDCl}_3$ , 600 MHz).

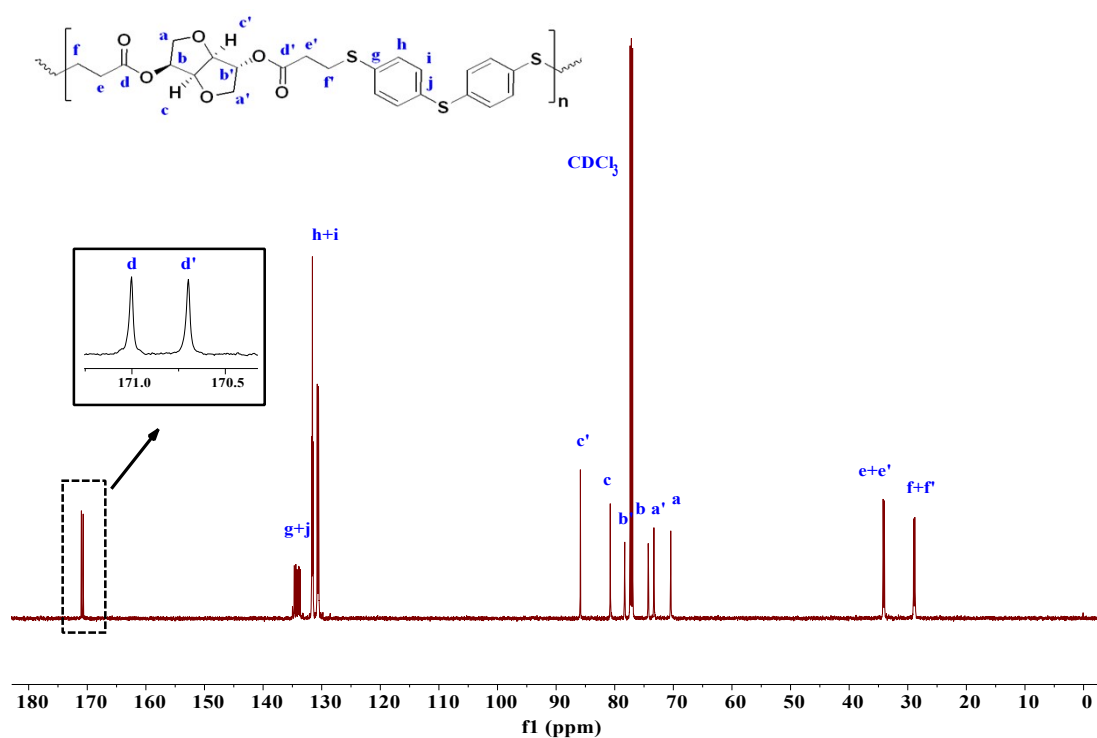

Figure S30.  $^{13}\text{C}$  NMR spectrum of  $\text{PIT}_{100}\text{E}_0$  synthesized by  $[\text{DBU}][\text{Lac}]$  ( $\text{CDCl}_3$ , 150 MHz).

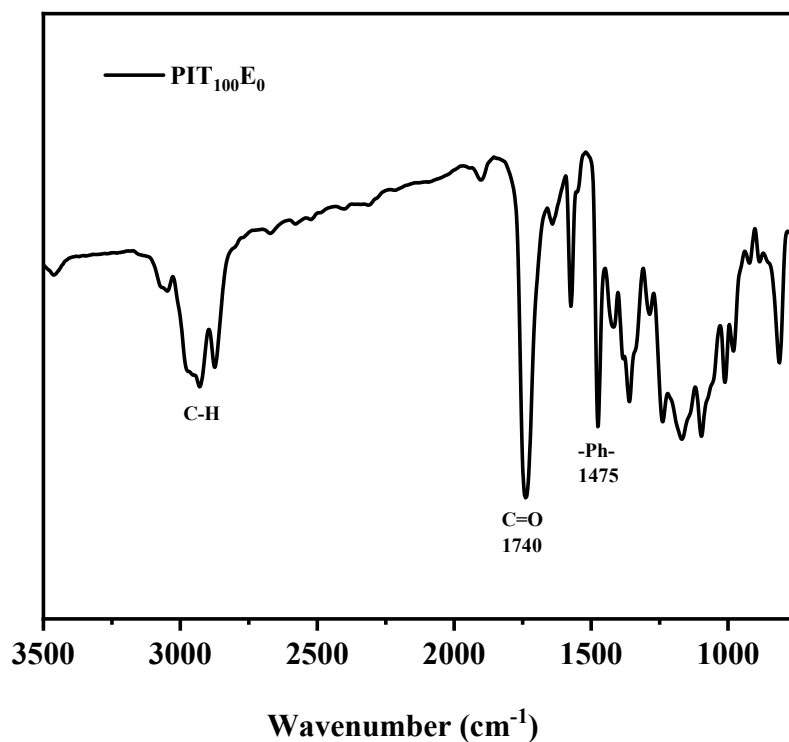

**Figure S31.** FT-IR spectrum of PIT<sub>100</sub>E<sub>0</sub> synthesized by [DBU][Lac] (KBr).

PIT<sub>100</sub>E<sub>0</sub>: <sup>1</sup>H NMR (600 MHz, CDCl<sub>3</sub>, ppm) δ 7.26 (d, 8H), 5.17 (m, 2H), 4.81 (t, 1H), 4.45 (d, 1H), 3.93 (m, 3H), 3.79 (d, 1H), 3.15 (dt, 4H), 2.70 (t, 2H), 2.64 (t, 2H). <sup>13</sup>C NMR (150 MHz, CDCl<sub>3</sub>, ppm) δ 170.70, 134.37, 133.68, 131.58, 130.65, 85.86, 80.76, 78.31, 74.27, 73.34, 70.46, 34.01, 28.89. FT-IR (KBr, cm<sup>-1</sup>): 2975, 2930, 2871, 1740, 1638, 1571, 1480, 1423, 1357, 1290, 1238, 1168, 1095, 1008, 975, 809.

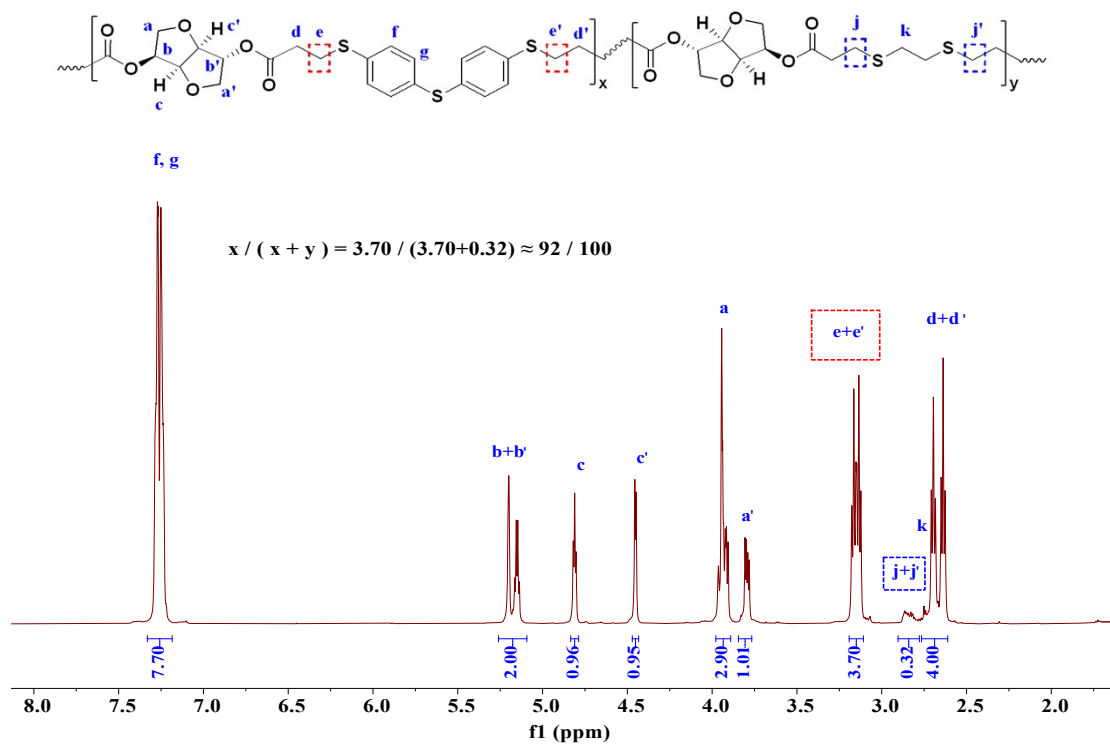

**Figure S32.**  $^1\text{H}$  NMR spectrum of PIT<sub>90</sub>E<sub>10</sub> synthesized by [DBU][Lac] ( $\text{CDCl}_3$ , 600 MHz).

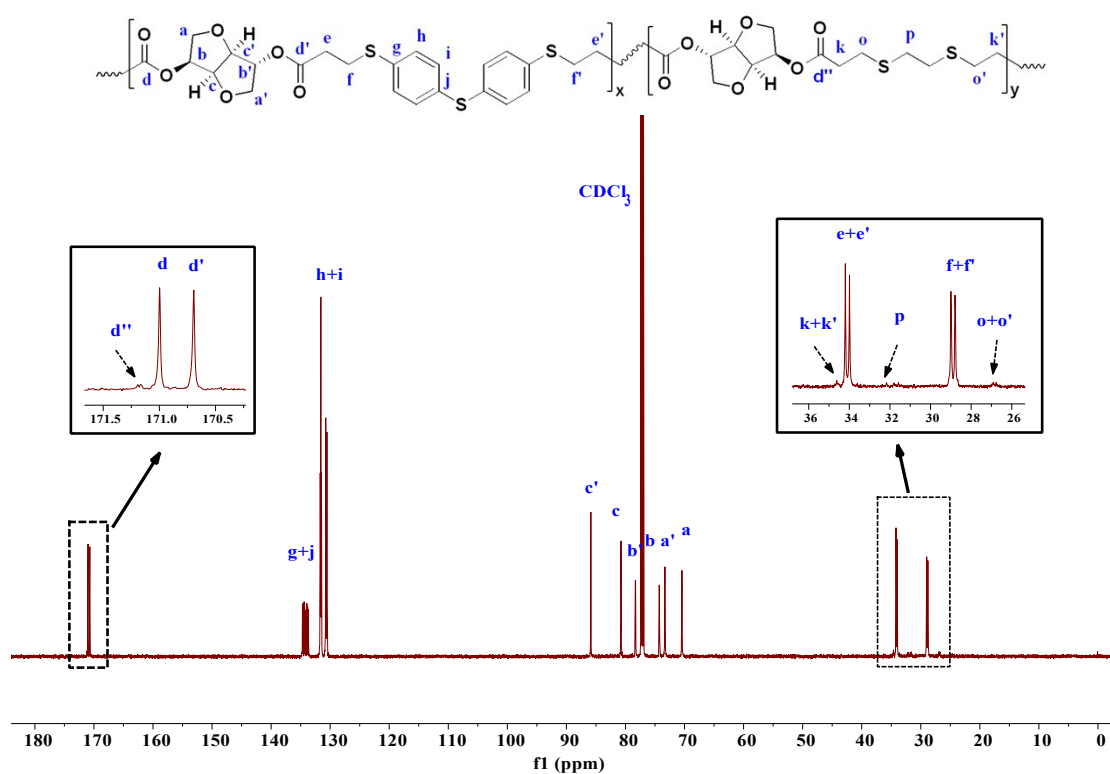

**Figure S33.**  $^{13}\text{C}$  NMR spectrum of PIT<sub>90</sub>E<sub>10</sub> synthesized by [DBU][Lac] ( $\text{CDCl}_3$ , 150 MHz).

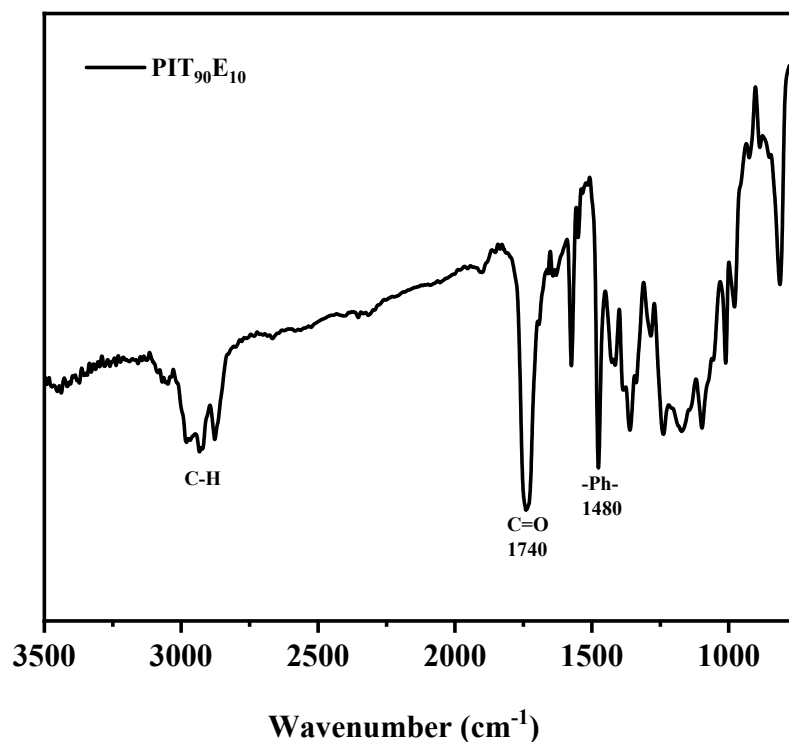

**Figure S34.** FT-IR spectrum of PIT<sub>90</sub>E<sub>10</sub> synthesized by [DBU][Lac] (KBr).

PIT<sub>90</sub>E<sub>10</sub>: <sup>1</sup>H NMR (600 MHz, CDCl<sub>3</sub>, ppm) δ 7.26 (d, 8H), 5.17 (m, 2H), 4.81 (t, 1H), 4.45 (d, 1H), 3.93 (m, 3H), 3.79 (d, 1H), 3.15 (dt, 4H), 2.84 (m, 0H), 2.67 (dt, 4H). <sup>13</sup>C NMR (150 MHz, CDCl<sub>3</sub>, ppm) δ 170.69, 134.37, 133.96, 131.58, 130.65, 85.86, 80.76, 78.31, 74.27, 73.29, 70.44, 34.01, 28.79. FT-IR (KBr, cm<sup>-1</sup>): 2980, 2932, 2876, 1740, 1638, 1575, 1480, 1425, 1355, 1283, 1238, 1168, 1095, 1012, 982, 811.



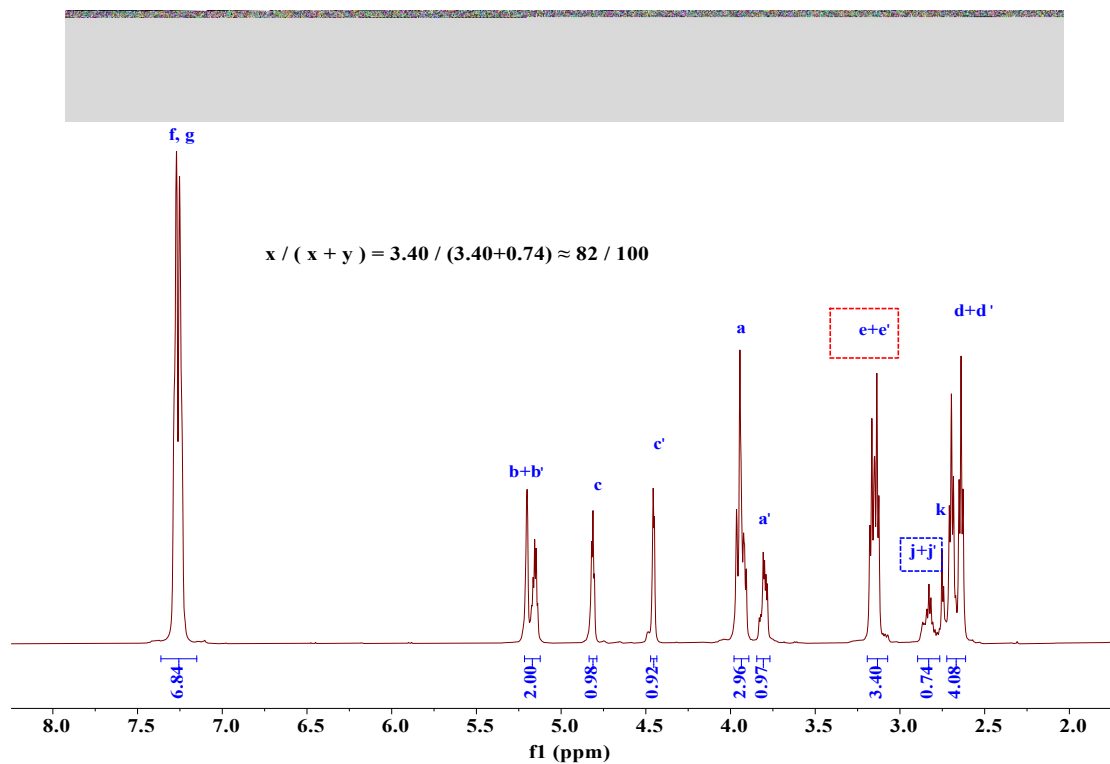

**Figure S35.**  $^1\text{H}$  NMR spectrum of  $\text{PIT}_{80}\text{E}_{20}$  synthesized by  $[\text{DBU}][\text{Lac}]$  ( $\text{CDCl}_3$ , 600 MHz).

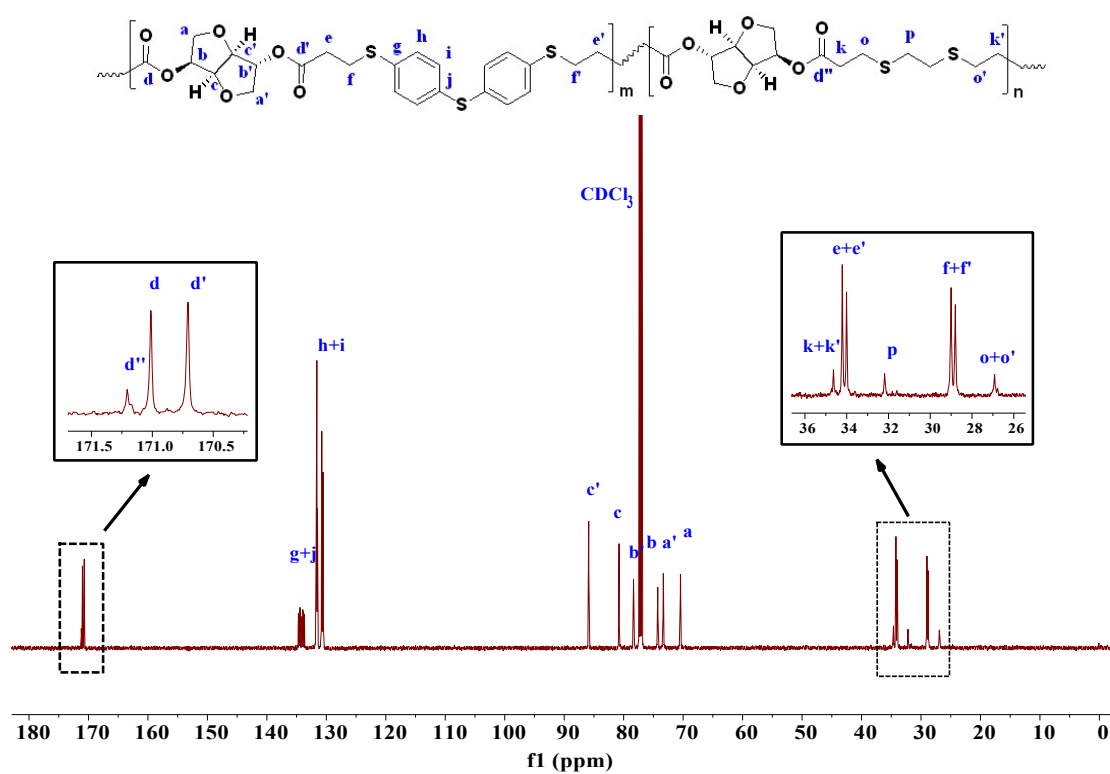

**Figure S36.**  $^{13}\text{C}$  NMR spectrum of  $\text{PIT}_{80}\text{E}_{20}$  synthesized by  $[\text{DBU}][\text{Lac}]$  ( $\text{CDCl}_3$ , 150 MHz).

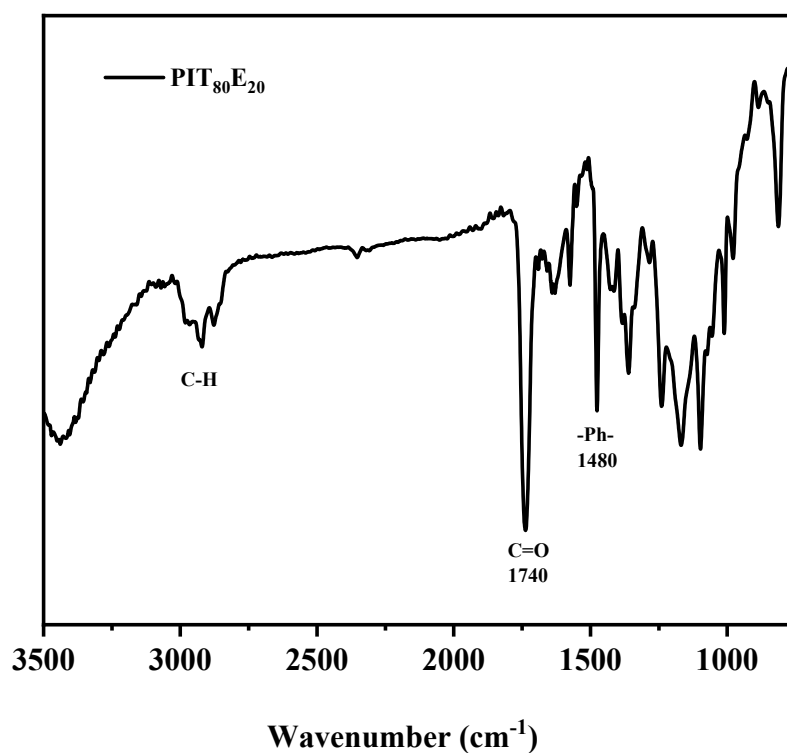

**Figure S37.** FT-IR spectrum of PIT<sub>80</sub>E<sub>20</sub> synthesized by [DBU][Lac] (KBr).

PIT<sub>80</sub>E<sub>20</sub>: <sup>1</sup>H NMR (600 MHz, CDCl<sub>3</sub>, ppm) δ 7.26 (d, 7H), 5.17 (m, 2H), 4.82 (q, 1H), 4.45 (d, 1H), 3.94 (m, 3H), 3.81 (d, 1H), 3.15 (dt, 3H), 2.83 (td, 1H), 2.67 (dt, 4H). <sup>13</sup>C NMR (150 MHz, CDCl<sub>3</sub>, ppm) δ 170.86, 134.52, 133.90, 131.59, 130.67, 85.88, 80.78, 78.32, 74.28, 73.34, 70.47, 34.63, 34.01, 32.18, 28.91, 26.92. FT-IR (KBr, cm<sup>-1</sup>): 2984, 2923, 2877, 1740, 1642, 1575, 1480, 1423, 1363, 1290, 1241, 1164, 1096, 1009, 975, 812.

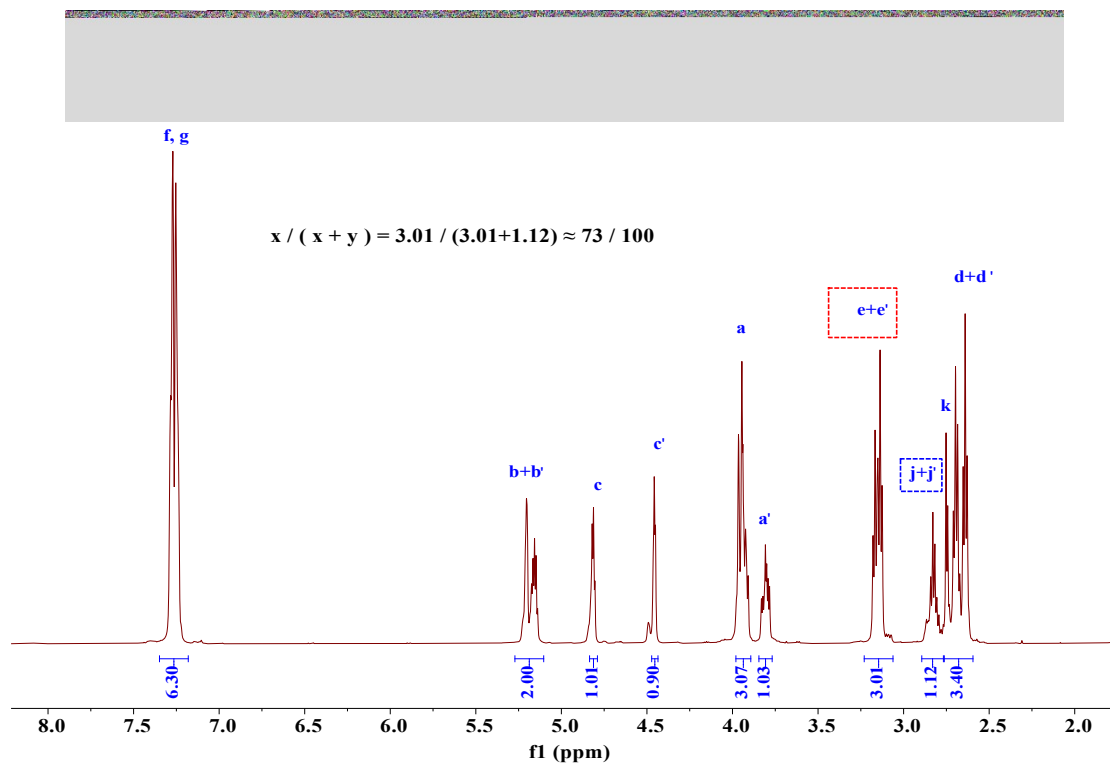

**Figure S38.**  $^1\text{H}$  NMR spectrum of PIT<sub>70</sub>E<sub>30</sub> synthesized by [DBU][Lac] ( $\text{CDCl}_3$ , 600 MHz).

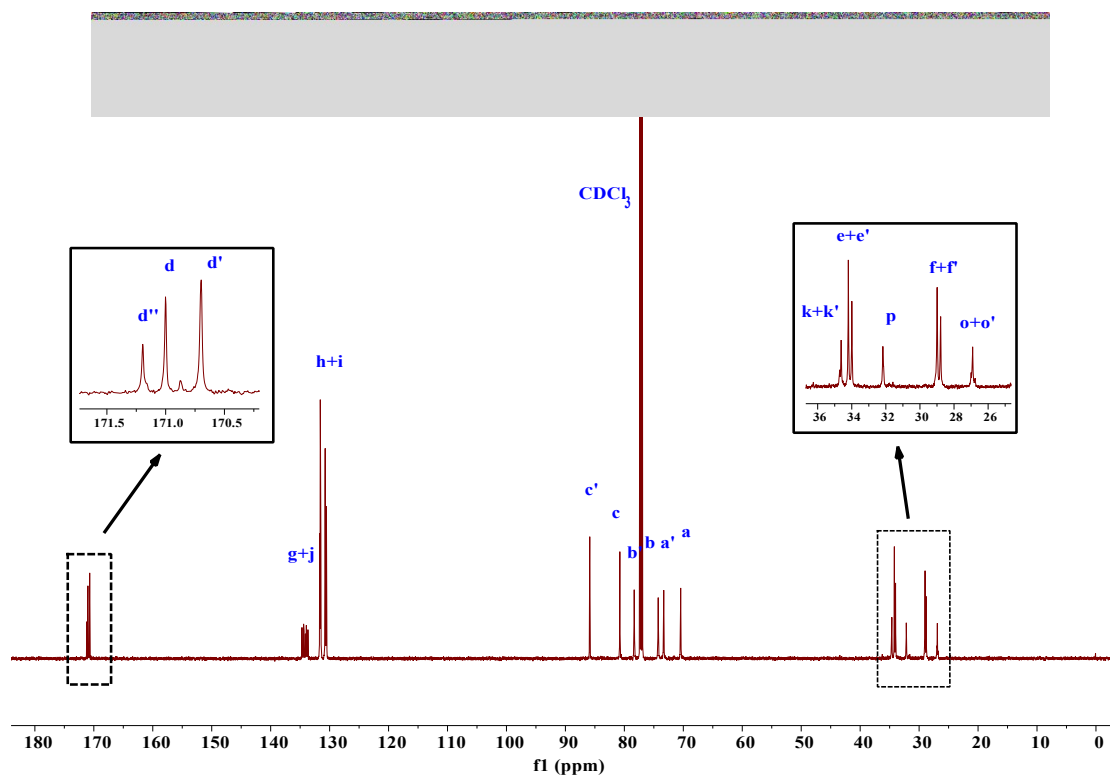

**Figure S39.**  $^{13}\text{C}$  NMR spectrum of PIT<sub>70</sub>E<sub>30</sub> synthesized by [DBU][Lac] ( $\text{CDCl}_3$ , 150 MHz).

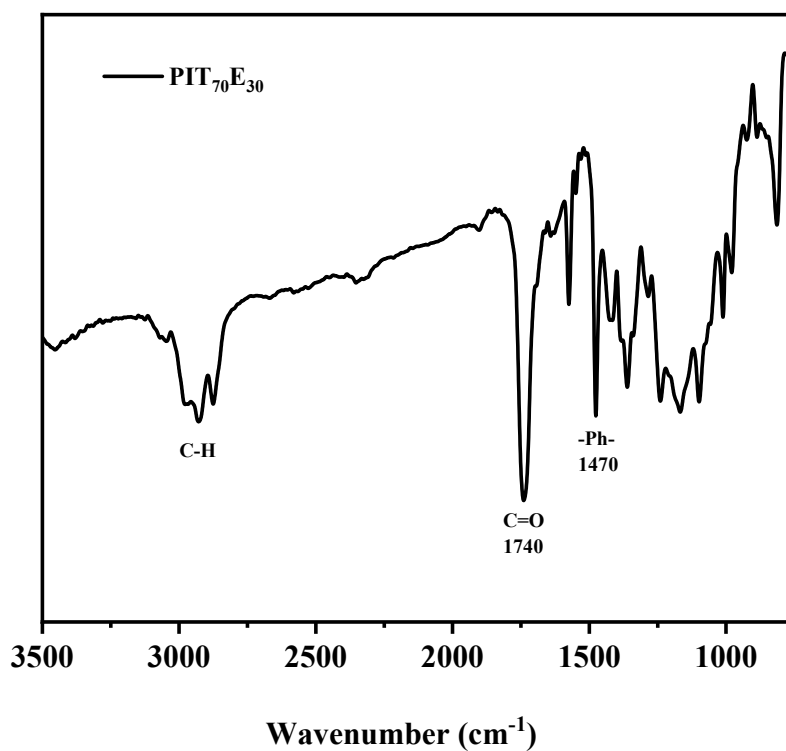

**Figure S40.** FT-IR spectrum of PIT<sub>70</sub>E<sub>30</sub> synthesized by [DBU][Lac] (KBr).

PIT<sub>70</sub>E<sub>30</sub>: <sup>1</sup>H NMR (600 MHz, CDCl<sub>3</sub>, ppm) δ 7.26 (d, 6H), 5.18 (d, 2H), 4.82 (q, 1H), 4.46 (t, 1H), 3.94 (m, 3H), 3.81 (d, 1H), 3.15 (dt, 3H), 2.82 (dt, 1H), 2.68 (m, 3H). <sup>13</sup>C NMR (150 MHz, CDCl<sub>3</sub>, ppm) δ 170.96, 134.49, 133.93, 131.58, 130.62, 85.87, 80.77, 78.33, 74.27, 73.32, 70.46, 34.67, 34.10, 32.17, 28.86, 26.91. FT-IR (KBr, cm<sup>-1</sup>): 2980, 2930, 2876, 1740, 1639, 1575, 1480, 1423, 1357, 1290, 1238, 1168, 1095, 1013, 976, 817.

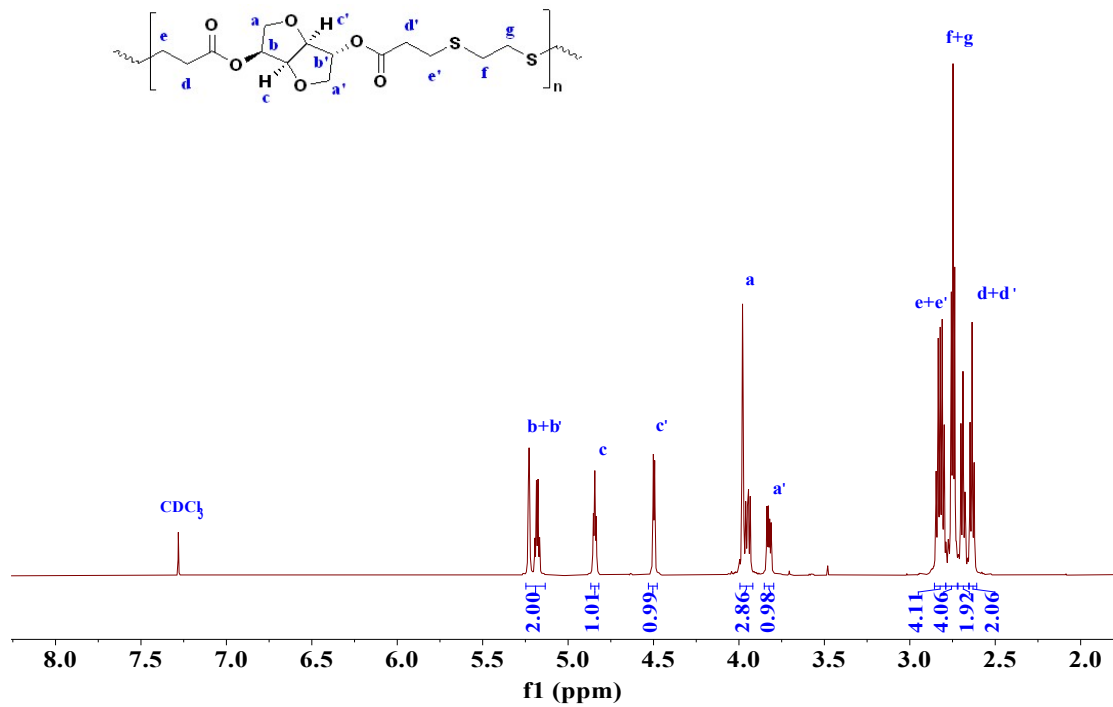

Figure S41.  $^1\text{H}$  NMR spectrum of  $\text{PIT}_0\text{E}_{100}$  synthesized by  $[\text{DBU}][\text{Lac}]$  ( $\text{CDCl}_3$ , 600 MHz).

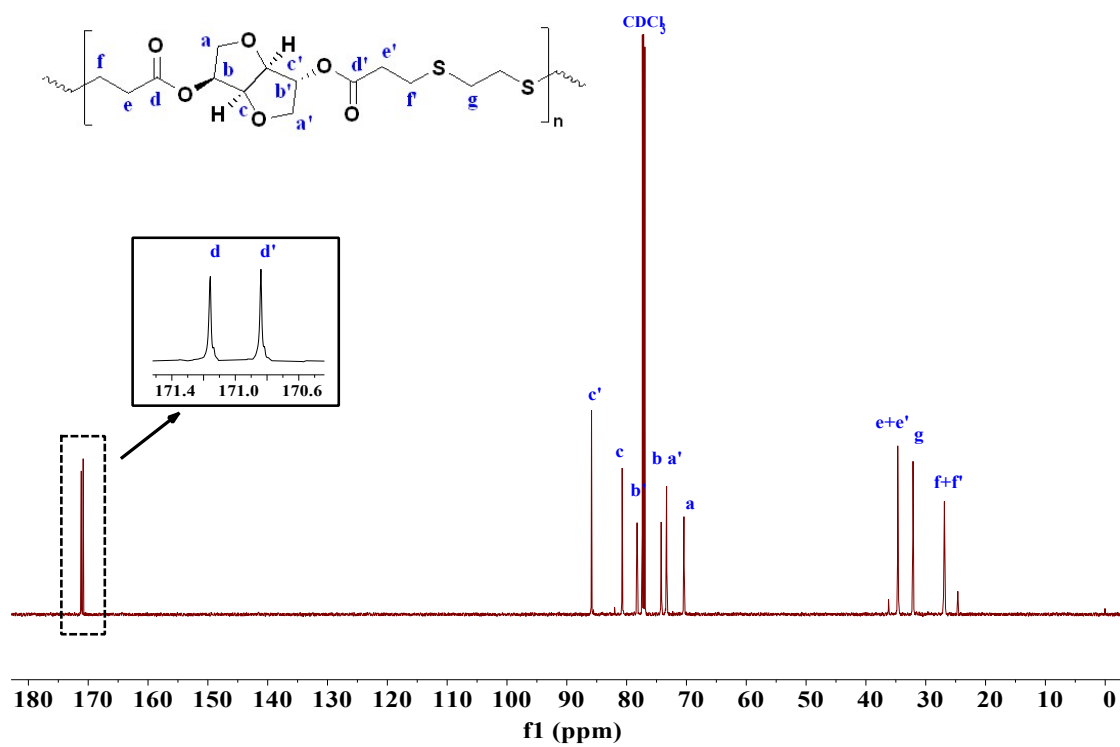

**Figure S42.**  $^{13}\text{C}$  NMR spectrum of  $\text{PIT}_0\text{E}_{100}$  synthesized by  $[\text{DBU}][\text{Lac}]$  ( $\text{CDCl}_3$ , 150 MHz).

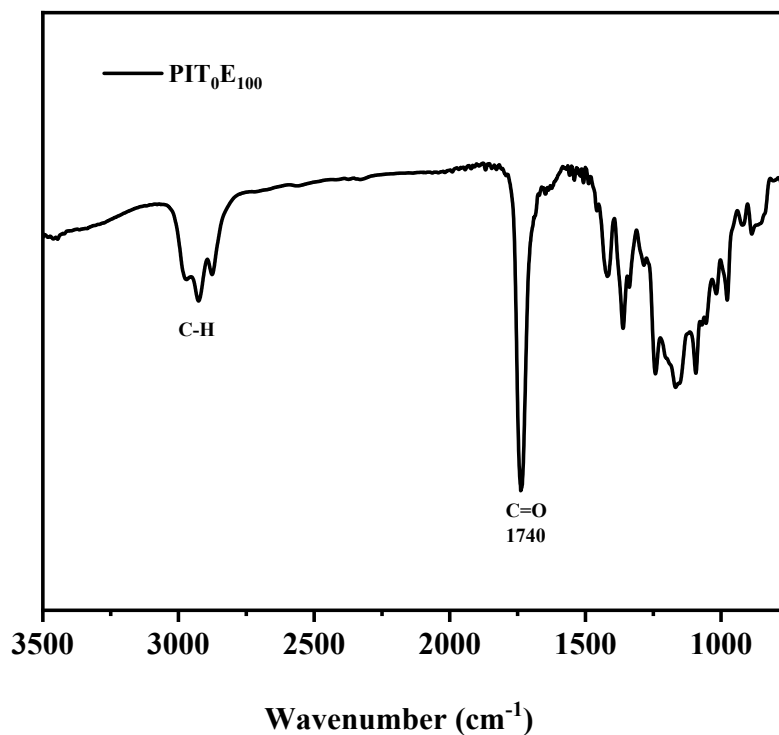

**Figure S43.** FT-IR spectrum of  $\text{PIT}_0\text{E}_{100}$  synthesized by  $[\text{DBU}][\text{Lac}]$  (KBr).

$\text{PIT}_0\text{E}_{100}$ :  $^1\text{H}$  NMR (600 MHz,  $\text{CDCl}_3$ , ppm)  $\delta$  5.20 (m, 2H), 4.84 (t, 1H), 4.50 (d, 1H), 3.96 (m, 3H), 3.82 (d, 1H), 2.82 (dt, 4H), 2.75 (m, 4H), 2.69 (t, 2H), 2.64 (t, 2H).  $^{13}\text{C}$  NMR (150 MHz,  $\text{CDCl}_3$ , ppm)  $\delta$  170.84, 85.87, 80.74, 78.25, 74.21, 73.30, 70.44, 34.65, 32.12, 26.91. FT-IR (KBr,  $\text{cm}^{-1}$ ): 2975, 2930, 2871, 1740, 1421, 1359, 1290, 1244, 1163, 1093, 1018, 977, 914, 882.

## Tensile test

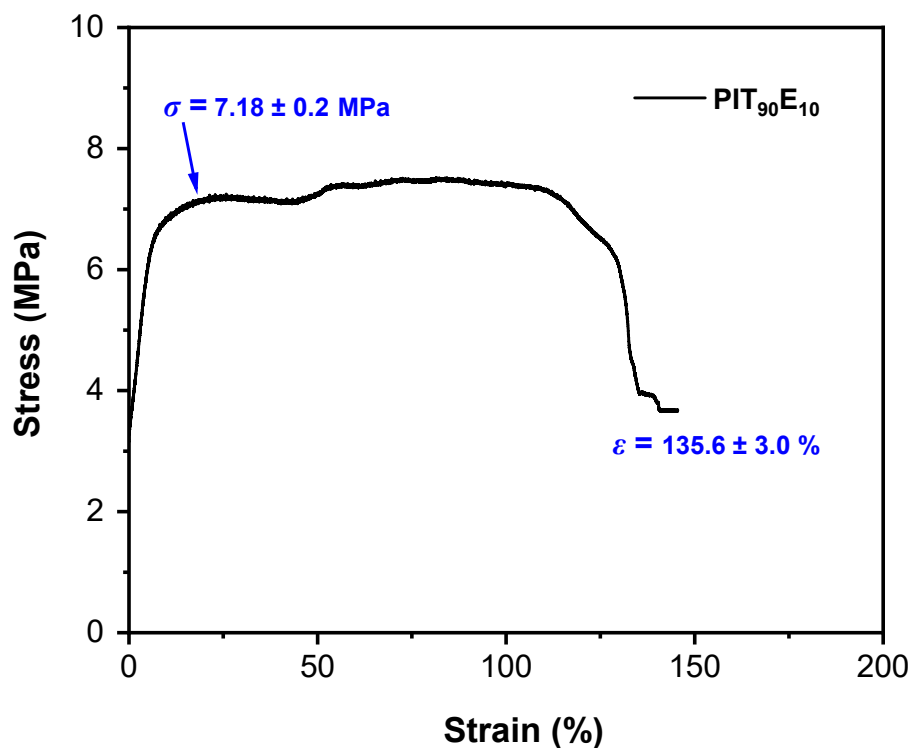

Figure S44. Mechanical behavior of representative PIT<sub>90</sub>E<sub>10</sub> sample.

## Swelling test

For polymer swelling capability testing, phosphate buffered saline (PBS) was chosen as the aqueous solution approaching the physiological environment of human body.<sup>1</sup> Firstly, the specimen of PIT<sub>90</sub>E<sub>10</sub> were weighed at dry state and the dry weight ( $W_d$ ) was obtained. Then it was immersed in PBS at a constant temperature of 37°C for fixed time interval and wet weight ( $W_w$ ) were assessed after the removal of extra water with the help of tissue paper. The mass swelling ratio (SR) is calculated using following equation.

$$SR = (W_w - W_d) / W_d \times 100\%$$

where  $W_w$  - mass of the swollen wet hydrogel sample,  $W_d$  - mass of the dried sample.

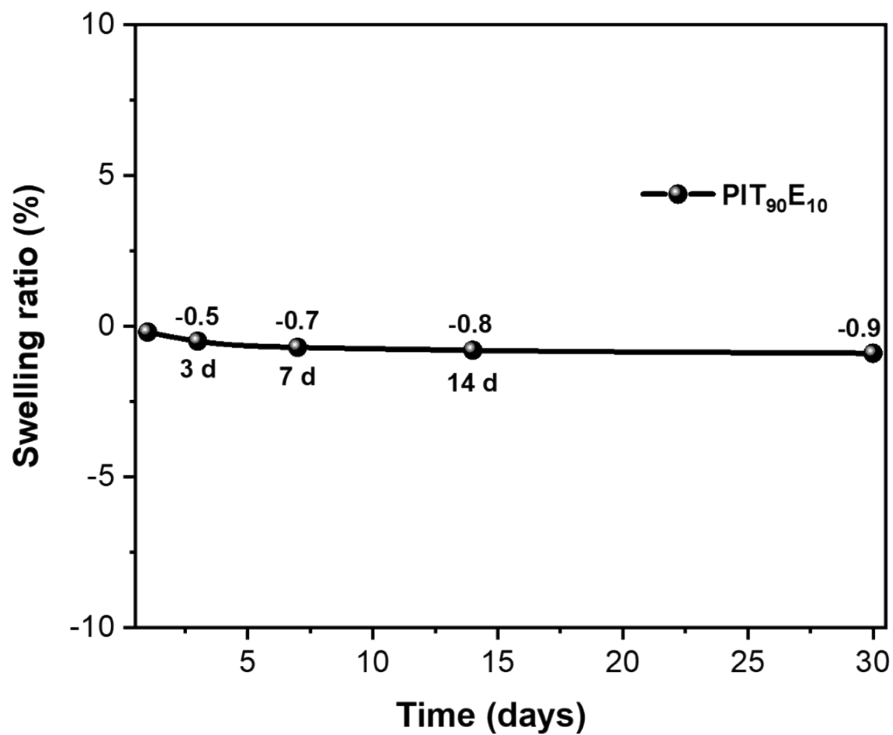

**Figure S45.** Swelling test of optical polymers in PBS buffer (pH = 7.4, 37 °C).

1. V. Hidalgo-Alvarez, N. D. Falcon, J. Eldred, M. Wormstone and A. Saeed, *Curr. Eye. Res.*, 2024, 1-10.
